# Supplementary material
Source: publisher site journal article supplement (https://www.spandidos-publications.com/7402/downloadSupplementary)
Supplement: Supplementary file 1 [file downloadSupplementary]

## Sheet: ROC data
Data S2. The Hepatocellular Carcinoma Database (HCCDB) is a comprehensive resource dedicated to the study of hepatocellular carcinoma (HCC), a common and aggressive form of liver cancer. This database aims to facilitate research by providing an accessible platform for the analysis of HCC-related genomic and clinical data. Researchers can use HCCDB to explore gene expression patterns, identify pot…
CPSF1 HCC	CPSF1 NORMAL	CPSF2 HCC	CPSF2 NORMAL	CPSF3 HCC	CPSF3 NORMAL	CPSF4 HCC	CPSF4 NORMAL	CPSF5 HCC	CPSF5 NORMAL	CPSF6 HCC	CPSF6 NORMAL	CPSF7 HCC	CPSF7 NORMAL
9.94	10.24	9.9	9.71	10.43	9.04	10.76	8.39	11.0934	10.388	9.43	10.32	11.04	10.81
10.75	10.01	10.82	9.41	9.96	8.99	9.17	8.56	11.4046	10.236	10.84	9.21	11.17	10.24
10.74	10.27	9.82	9.71	9.11	9.39	8.31	8.65	9.29692	10.7582	10.85	9.67	10.88	10.37
10.79	10.02	9.8	9.64	10.1	8.94	10.05	7.46	11.8486	9.83289	10.7	9.26	10.32	10.23
10.66	9.81	10.13	10.04	9.47	9.27	8.68	7.99	11.158	10.4168	10.43	9.33	11.63	9.98
10.75	10.01	10.55	10.14	9.64	9.08	8.74	7.67	11.3652	10.2396	10.62	9.55	10.94	10.22
11.21	9.75	9.68	9.6	9.27	9.28	9.25	8.53	10.0634	10.3399	10.75	9.28	10.99	10.15
11.02	9.76	9.71	10.09	10.58	9.08	9.72	8.25	10.007	10.9255	10.72	9.69	10.47	10.49
11.22	10.4	9.15	9.88	9.83	9.06	9.21	8.73	11.7781	10.021	10.17	9.31	10.44	10.07
11.58	10.41	9.98	9.53	9.28	9.18	8.72	7.94	10.1548	10.8065	9.8	8.86	10.53	10.55
9.5	9.74	9.74	9.78	8.78	8.94	9.57	8.44	10.6537	11.0768	9.42	9.1	10.64	9.91
11.5	10.13	10.3	9.53	10.01	8.88	9.09	7.67	9.69697	10.058	10.13	9.21	10.71	10.56
13.34	10.51	10.14	9.16	10.21	9.5	10.59	9.15	11.0286	10.5943	11.11	9.22	11.58	9.28
11.01	10.42	9.29	9.68	9.17	9.04	8.74	8.32	11.7	9.9571	9.81	9.72	10.28	10.44
12.19	10.03	9.89	10.22	9.73	9.36	9.34	8.33	10.8842	10.2562	10.12	9.67	10.25	10.13
11.66	10.61	9.6	9.82	9.56	9.02	9.66	8.38	11.1818	10.8423	10.02	9.21	10.01	10.08
11.32	9.76	8.36	9.88	9.74	9.22	8.81	8.05	9.30834	10.6129	9.93	9.8	10.99	10.21
10.56	10.96	9.6	9.73	9.22	8.87	8.69	8.56	10.5953	10.4409	9.92	9.9	10.76	10.64
12.35	10.23	9.88	9.98	9.32	9.13	8.67	8.67	9.90388	10.8146	9.54	9.84	9.96	10.66
12.17	10.57	9.88	9.38	10.42	9.17	9.47	8.89	11.4194	10.3565	10.27	9.25	10.45	10.15
10.72	10.17	9.78	9.56	9.12	9.09	9.16	8.26	9.98726	10.3934	9.82	9.92	9.76	10.34
11.33	10.77	10.49	9.87	9.27	9.11	9.47	8.36	10.4284	10.6978	10.26	9.54	10.41	10.32
11.39	9.88	9.12	9.41	9.6	9.17	8.86	8.62	10.3685	9.14975	10.36	9.29	10.33	9.62
10.8	10.13	9.46	9.86	9.15	9.22	9.09	8.3	10.6294	10.1306	9.64	10.07	10.33	10.3
10.83	9.98	10.29	10.01	9.71	9.05	9.64	8.36	11.4003	9.94691	10.64	9.5	10.86	10.5
10.59	10.77	9.67	9.74	10.14	8.92	9.99	8.83	10.0348	10.7895	10.37	9.52	10.01	10.68
11.65	10.57	8.96	9.27	9.39	9.12	9.14	8.98	10.9159	10.062	9.58	9	9.86	9.92
12.55	10.33	9.11	9.87	9.33	9.11	8.74	8.29	10.6475	10.1911	10.01	9.35	10.81	9.87
10.09	10.75	8.24	9.8	8.76	9.02	9.04	8.59	10.0566	11.3236	9.82	9.68	10.11	10.43
10.48	9.95	9.85	9.76	9.39	9.19	9.18	8.41	10.3276	11.3343	9.87	9.43	10.59	10.35
10.98	10.46	8.58	9.67	9.54	9.17	9.03	9.07	10.3197	11.3049	9.55	9.67	9.79	10.19
10.43	10.49	9.94	9.5	9.93	9.16	8.74	8.44	10.151	10.8517	10.3	9.56	10.63	10.3
10.49	10.28	9.75	10.08	10.01	9.22	9.55	8.24	10.1573	10.5401	10.14	9.77	10.72	10.49
9.95	10.77	9.82	9.83	9.46	9	9.08	8.34	10.7707	10.4126	9.68	9.79	10.27	10.36
11.48	10.29	10.06	9.8	9.8	8.9	9.69	8.08	10.8986	10.8345	10.62	9.42	11.01	10.42
10.63	10.33	9.99	9.68	8.9	9.15	8.89	8.48	10.0688	11.4393	10.59	9.5	10.96	10.19
10.54	10.7	10.11	9.76	9.45	9.05	8.4	8.76	11.0293	10.9144	10.19	9.5	10	10.35
10.75	10.56	9.87	9.17	9.68	9.06	9.59	9.08	11.5122	10.9578	9.52	9.14	10.03	9.94
10.42	10.25	9.96	9.92	9.17	9.06	8.99	8.21	11.3794	11.3421	9.89	9.6	10.54	10.29
11.79	10.14	10.14	9.95	9.6	9.19	9.28	8.43	10.2264	10.2946	10.3	9.83	11.2	9.99
11.49	9.81	10.15	10.25	9.76	9.18	9.03	8.07	10.9937	10.4242	10.57	9.24	11.23	9.76
11.53	10.54	9.59	9.51	9.38	9.05	8.96	8.13	11.88	11.0755	9.55	9.63	10.47	10.2
10.81	10.44	9.92	9.57	9.74	9.01	8.94	8.69	10.642	9.86728	10.2	9.07	10.76	9.84
10.4	10.59	10	9.97	9.4	9.04	9.02	8.4	11.2438	11.233	9.76	9.42	10.66	10.21
11.11	10.54	9.62	9.59	9.09	9.13	9.07	8.46	10.268	9.82496	10.32	9.35	11.12	10.1
10.88	9.93	9.92	9.81	9.45	8.83	8.97	8.03	12.2868	10.5343	9.77	9.13	10.4	10.88
11.67	10.68	10.59	9.62	9.28	8.94	9.49	8.63	11.2485	10.4398	10.43	9.84	10.7	10.62
11.35	10.32	9.73	9.59	9.71	9.05	8.57	8.59	11.1344	10.2408	10	9.86	10.58	10.11
10.86	10.08	10.19	10.1	9.35	9.34	8.26	8.25	10.2562	9.68124	10.16	9.52	10.73	10.2
12.27		9.56		9.14		8.62		9.52356	9.84392	9.2		10.55
11.73		9.58		10.02		9.53		10.0293	10.3387	10.12		10.28
10.38		10.47		8.95		8.92		10.3772	10.2644	9.85		10.26
10.72		10.08		9.63		9.15		11.258	9.97871	9.96		10.98
10.04		9.85		9.24		8.28		11.2113	10.6812	9.28		10.43
11.02		10.17		9.67		9.34		11.5845	9.8857	10.09		10.47
11.43		10.19		9.3		8.94		10.5971	10.1898	10.22		10.81
10.45		9.94		9.16		8.92		10.6138	10.4939	9.7		10.59
11.65		10.12		9.01		9.23		11.3281	10.9614	9.75		10.85
12.27		9.19		9.75		9.76		11.3945	10.2515	9.49		9.2
11.29		9.8		9.95		10.1		11.994	10.4062	9.84		9.7
11.2		9.91		9.54		8.95		10.2715	10.2633	9.93		10.42
11.09		9.63		9.62		9.42		10.014	10.3332	9.76		11.08
10.99		10.15		9.47		8.99		10.6952	11.0217	10.6		11.21
10.28		9.73		10.37		9.66		11.173	10.5068	9.81		10.6
11.33		9.14		9.78		9.63		11.6234	10.1762	10.87		11.35
10.09		10.14		10.35		9.17		9.52943	10.8588	9.41		10.95
10.27		9.87		9.37		8.88		10.5421	10.4115	9.27		10.35
11		8.86		9.39		9.66		10.8611	11.0681	9.98		10.42
10.53		9.76		9.93		9.4		10.6193	10.0526	10.12		11.03
10.42		8.84		10.13		8.95		10.3772	10.014	9.83		10.57
11.06		9.93		9.26		9.66		11.2082	11.0272	9.95		11.05
10.84		10.16		9.79		8.7		10.4315	11.0084	10.3		10.27
10.42		9.52		8.69		9.41		9.77479	10.7004	10.56		10.03
10.99		9.33		10.18		9.87		9.57743	10.4115	10.92		10.82
10.4		10.09		9.51		8.64		10.5488	11.2348	9.84		10.57
10.09		9.93		9.69		9.07		9.63118	10.1163	9.47		10.38
10.23		9.3		9.42		8.82		10.7296	10.7591	9.65		11.13
10.6		9.52		10.17		9.74		10.5774	10.4929	8.46		11.11
12.02		9.58		9.07		8.62		9.91438	9.71253	9.67		10.14
11.35		9.91		9.84		9.67		11.3393	10.1007	10.79		10.26
10.01		10.04		9.95		9.24		10.8218	9.84706	10.03		10.45
13.13		9.3		10.7		12.52		10.2738	9.85019	9.49		9.23
11.15		9.59		9.99		9.91		10.444	10.0566	9.89		10.27
10.16		10.4		9.73		8.8		9.7879	10.4231	10.11		10.8
9.74		9.47		9.67		9.33		11.4954	10.5078	10.11		10.39
10.93		9.98		8.99		8.8		10.9901	10.5878	10.17		11.12
10.37		10.44		9.42		8.16		11.7288	10.8313	9.97		9.84
11.69		9.51		9.46		9.65		11.1637	9.76653	9.81		10.47
11.17		9.23		10.12		9.12		10.1472	11.0042	10.36		10.64
11.24		9.96		9.85		9.05		11.5113	10.9322	10.02		9.93
12.14		9.6		9.41		9.48		11.6869	10.7624	9.81		9.41
11.57		9.71		10.58		10.16		10.3253	11.218	9.58		10.3
9.89		9.68		8.93		9.89		11.3663	10.3095	9.92		11.2
9.89		9.53		9.29		8.45		11.1755	10.9672	9.43		10.67
11.05		9.48		9.9		9.58		10.0362	10.1007	9.75		11.13
10.67		10.07		9.64		8.58		10.3955	10.8041	10.09		10.44
11.84		9.84		9.6		8.9		11.3587	11.1605	9.49		10.5
11.61		9.79		9.34		8.91		10.8681	10.8138	9.72		9.86
11.67		9.8		9.52		8.88		9.33762	10.7013	9.67		10.41
11.56		9.93		9.46		9.35		10.3696	10.6275	10.1		10.56
11.82		9.59		9.85		9.9		10.7731	10.3253	10.12		10.32
12.04		10.28		9.7		9.34		11.3112	10.23	10.5		12.64
11.4		9.77		10.7		10.03		9.10852	10.4838	9.7		10.89
10.96		9.35		9.74		8.08		11.0224	11.2586	10.6		10.81
10.73		10.12		9.4		9.61		9.20457	10.5177	9.71		10.72
10.49		10.19		9.48		8.69		10.7305	10.1383	10.29		10.53
9.76		9.57		9.74		8.26		10.058	10.1176	11.05		11.63
10.07		9.95		9.47		8.62		11.3348	11.5396	9.91		10.26
11.03		9.6		9.71		9.55		10.8065	9.72622	9.63		9.85
10.63		10.1		9.18		8.77		9.74651	10.5803	9.57		10.66
11.59		10.08		9.55		9.98		11.4686	10.0444	10.43		10.9
11.27		10.05		8.93		9.89		11.9697	9.29692	10.1		10.89
11.22		9.42		10.89		8.21		10.5294	10.5999	10.46		10.64
10.71		10.09		9.62		8.29		11.2685	10.5068	9.98		10.49
10.21		10.47		10.58		8.97		10.6751	10.3129	10.35		11.14
9.94		8.81		9.34		9.72		10.7657	10.5699	9.61		9.17
11.04		10.28		9.21		9.72		11.3443	10.7381	10.42		10.67
11.15		10.05		9.15		9.12		13.03	10.3826	10.79		10.97
10.35		9.59		9.48		9.76		9.79116	10.1072	9.99		10.93
12.41		10.4		10.22		9.69		9.24555	10.7797	10.9		11.27
11.49		8.98		9.51		8.7		9.65284	10.5333	9.87		10.29
10.23		10.1		10.27		8.97		9.37504	11.0244	9.62		10.02
10.86		10.12		9.86		9.58		9.74651	10.5915	8.9		9.86
11.31		10.41		10.35		9.77		10.3117	10.4263	10.59		11.07
10.4		8.68		9.77		9.06		10.7177	10.8557	9.79		9.61
11.44		9.28		9.53		9.72		9.99435	10.0014	10.24		10.52
9.94		10.82		9.68		8.77		10.5641	10.1319	10.57		11.45
11.87		9.63		9.67		8.98		11.242	10.8202	9.7		10.32
10.6		10.06		9.97		9.55		11.0526	10.3509	10.08		10.18
11.07		10.05		9.76		9.45		9.97298	10.6839	9.06		9.91
10.93		9.27		10.56		9.9		10.567	10.7457	9.59		11.13
12.07		9.22		9.55		9.52		10.4686	10.676	9.67		10.13
10.52		9.78		9.29		8.95		10.4574	10.9084	9.5		10.69
10.23		9.96		9.69		8.62		11.0782	10.9091	10		11.07
11.3		9.67		9.38		9.01		11.5897	10.236	9.68		10.24
10.63		9.72		9.39		9.62		11.3614	11.1222	9.39		10.29
11.67		9.94		9.72		9.45		10.6926	11.0224	10.64		10.45
11.85		10.14		9.38		8.41		10.9593	10.9801	10.09		10.13
9.85		9.88		9.31		7.94		10.6768	11.3674	9.28		10.24
11.08		9.92		9		9.37		11.1137	10.5488	10.06		11.48
10.36		10.18		9.3		8.86		13.1943	10.5275	9.43		10.73
11		9.94		10.57		9.75		10.6573	10.5641	10.54		11.02
11.1		10.12		9.26		9.43		10.9894	11.1111	10.99		11.24
11.38		9.53		10.13		10.61		10.9129	10.9293	10.94		10.95
10.33		10.29		9.8		8.96		10.6402	11.6497	10.76		10.73
10.61		9.41		9.87		9.55		10.9061	11.2946	10.4		10.7
11		10.1		9.81		8.27		11.1376	9.52748	10.04		10.65
11.52		9.56		9.4		9.07		11.2396	10.1561	9.9		10.06
10.74		9.53		9.35		8.97		9.06609	9.79116	9.1		9.41
11.75		9.87		9.57		10.37		9.9571	10.568	10.53		10.68
10.95		8.7		10.18		9.74		11.8638	11.7503	9.6		10.03
11.93		10.02		10		10.67		10.2204	10.3587	10.79		10.57
11.21		9.98		9.3		9.2		9.45327	10.1737	10.64		10.72
11.38		9.83		9.36		8.79		10.5314	11.2715	10.01		11.13
10.74		9.65		10		9.39		10.8857	10.7507	10.57		10.11
11.33		9.3		8.99		9.54		10.2843	11.2052	10.19		10.92
9.65		9.76		9.76		9.41		10.6952	11.2318	10.12		10.75
10.62		8.54		9.22		9.15		10.3966	9.76321	9.57		10.63
10.78		9.03		9.97		9.56		10.255	12.3376	9.76		9.35
10.95		10.43		9.38		9.42		10.3443	10.7879	10.73		10.87
12.03		10.17		9.21		9.07		10.2455	11.7723	10.04		10.4
11.3		10.17		9.48		10.31		9.71768	10.9929	9.71		10.12
12.18		9.26		9.94		9.79		11.0028	10.6493	10.42		11.34
11.35		10.32		9.49		9.27		11.2058	11.0369	10.08		10.86
10.45		9.81		9.4		8.96		11.6689	10.5177	10.05		10.6
10.75		9.54		9.05		8.95		8.96578	10.1319	10.09		10.57
11.71		9.39		9.11		8.67		10.5953	10.9046	10.1		10.42
10.72		10.25		9.27		8.63		10.5304	10.9593	9.7		10.35
10.28		10.07		9.68		9.56		10.268	10.716	10.33		10.72
10.84		9.65		11.03		10.02		11.117	10.5613	9.92		10.21
11.74		9.78		10.51		9.79		11.744	9.78463	10.48		10.46
10.71		9.43		9.12		8.74		10.9951	11.1052	10.05		11.46
11.39		9.87		9.35		9.13		11.1118	10.668	9.48		10.45
10.88		10.29		9.83		9.38		10.9758	10.4605	10.36		11.06
10.42		9.96		9.38		9.6		10.8502	10.3015	10.27		10.87
11.37		10.77		9.54		9.68		9.80574	9.9629	9.88		10.1
13		9.36		9.48		9.49		8.93958	10.2574	10.29		10.66
11.25		9.5		9.5		9.41		9.3443	10.6211	9.86		10.95
10.7		10.08		9.54		9.34		11.6316	10.3945	10.15		10.61
10.7		9.28		9.22		9.13		11.5868	10.1395	8.72		10.38
10.73		9.92		9.54		9.53		8.42627	11.3276	10.21		10.62
10.93		10.35		10.13		10.26		10.4635	10.5717	10.49		11.23
10.68		8.79		9.55		10.88		11.102	10.3815	10.19		9.57
10.53		9.27		9.37		9.11		11.1312	10.1535	9.93		10.78
11.34		9.72		9.57		8.5		10.9084	10.6092	9.54		10.59
10.8		9.77		9.75		9.25		10.9643	10.8541	10.23		9.6
10.7		9.22		9.52		9.05		10.8057	11.858	10.33		11.32
10.79		10.26		9.63		9.24		10.4808	10.7781	9.75		11.68
11.86		9.87		10.21		10.33		12.0634	10.6609	9.25		9.86
10.15		9.67		10.1		8.54		10.8218	10.6812	10.32		11.42
11.81		9.99		9.29		8.95		10.2843	10.1072	10.28		10.86
10.71		9.87		10.27		8.7		11.3208	9.98584	9.48		9.04
11.66		9.31		9.84		8.75		11.1824	11.5836	10.88		10.72
10.9		9.77		9.53		9.18		10.2288	9.72281	10.41		10.46
10.89		9.99		8.97		8.49		11.6782	10.2276	9.78		10.73
10.43		9.95		9.53		9.05		11.8994	10.9196	9.97		10.51
10.69		10.07		9.55		9.22		10.9403	11.6564	10.11		10.29
11.55		9.69		9.19		8.69		9.74147	9.73301	9.51		10.63
11.26		9.48		9.65		9.57		9.90839	9.79928	10.71		11.05
11.16		10.16		8.92		9.23		10.3498	10.1293	9.82		10.61
12.05		9.49		9.67		9.32		10.9278	10.2336	9.98		10.51
10.61		10.25		9.42		8.85		9.57932	10.4263	10.02		10.41
10.44		10.86		9.88		8.45		11.87	10.6645	10.59		10.57
11.82		10.52		11.2		9.39		11.6179	9.37286	11.08		11.51
12.12		9.75		9.72		9.05		11.8062	10.8941	9.67		9.84
10.45		9.28		8.75		9.7		11.4372	10.3652	10.88		10.97
10.53		8.98		9.55		9.92		10.8634	11.9586	9.6		10.95
10.92		9.75		9.23		9.08		10.5556	11.0007	10.23		11.05
11.56		10.04		9.26		9.17		11.0512	11.7973	10.23		10.45
10.92		9.89		9.73		9.79		11.716	10.7228	9.86		11.61
11.11		9.87		9.03		8.07		9.16239	11.4341	9.59		10.75
11.09		9.5		8.98		9.16		10.0251	10.7855	9.46		11.08
11.72		9.81		9.29		9.27		11.9444	10.4543	10.92		11.26
10.23		10.44		9.43		8.59		10.3117	10.3049	10.28		10.51
9.95		9.97		9.27		8.02		10.2597	10.7879	9.88		10.06
9.84		10.24		9.16		8.54		10.6184	10.3421	10.17		10.56
11.28		9.31		9.48		8.8		9.27612	10.973	10.42		10.49
11.18		9.28		9.51		9.37		12.2076	10.7347	9.7		11.21
10.97		9.41		9.51		9.37		11.3225	11.0987	10.74		10.98
11.22		10.04		9.65		9.35		9.91886	11.1331	10.35		10.84
11.06		9.76		9.97		10.08		10.7048	10.1189	10.59		10.4
12.71		9.66		10.99		10.89		11.0928	10.3565	9.47		10.29
11.17		9.21		9.12		9.4		12.2043	9.92184	10.42		10.58
10.76		9.46		9.68		9.54		10.2155	10.5314	9.61		11.31
10.64		10.06		9.26		8.74		10.151	11.0098	9.62		10.46
11.59		9.82		9.51		9.17		11.0888	10.3663	9.95		10.45
10.85		9.98		9.12		8.26		11.3581		9.48		10.41
11.99		9.91		9.24		9.11		11.1157		10.33		10.32
11.49		10.01		9.44		9.22		10.7731		10.14		11.72
11.33		9.74		9.82		9.07		10.3487		9.77		10.09
10.41		9.9		9.01		8.23		10.9513		9.95		10.55
12.14		10.06		9.83		8.98		11.0458		10.5		10.13
10.54		10.26		9.76		9		9.92035		10.28		11.14
10.5		9.7		9.66		9.04		9.55459		9.61		10.03
11.88		8.84		9.28		9.47		10.4481		10.12		10.86
11.21		9.2		9.55		9.34		10.6961		9.57		10.52
10.57		9.72		9.72		10.14		10.8162		8.79		11.35
10.54		9.54		10.03		9.04		8.94544		10.14		10.82
12.18		9.73		9.54		9.16		10.0768		9.95		10.09
10.11		10.53		9.26		8.56		10.196		9.66		10.59
10.82		9.9		10.09		9.12		11.944		10.41		10.94
10.72		9.5		11.05		10.22		10.1072		9.53		9.88
12.34		9.57		9.15		9.61		10.6564		9.96		10.32
11.22		9.87		9.22		8.66		10.66		9.68		10.17
11.6		9.99		9.49		9.05		11.899		10.27		10.93
11.47		10.29		10.18		9.12		10.3912		10.44		10.25
10.5		9.76		9.17		9.03		11.6398		9.27		10.09
11.18		10.42		9.7		8.86		9.51373		10.56		10.97
9.98		9.91		10.54		10.39		10.6193		7.87		9.96
10.9		9.71		9.25		8.64		11.5603		9.47		10.58
11.9		9.84		9.36		9.03		10.0512		10.63		10.92
10.94		10.09		9.38		8.73		11.5632		9.61		10.56
11.48		9.76		9.27		9.29		9.69871		10.05		11.26
10.73		9.89		9.19		8.71		11.4194		9.61		10.57
11.78		10.28		9.37		8.05		10.1472		10.51		10.82
10.38		9.82		9.59		9.22		9.90989		9.81		11.77
12.32		9.54		9.55		10.61		9.96723		9.36		9.55
11.56		9.69		9.83		9.14		10.9908		10.69		10.66
11.17		9.94		9.39		9.28		11.4963		10.38		11.02
10.49		10.34		9.43		8.67		10.0526		9.86		10.48
10.5		10.01		9.32		9.2		10.8313		9.33		10.19
11.9		9.91		9.53		9.33		10.2877		10.21		10.27
11.54		10.44		9.64		9.26		10.0755		10.21		10.57
10.71		9.84		9.38		8.63		10.1948		10.2		11.01
11.21		9.5		9.49		9.15		10.9958		10.26		10.43
12.04		9.44		9.86		9.39		10.0647		10.48		10.77
10.47		9.8		10.39		8.89		10.5962		9.68		10.57
10.85		10.06		9.42		8.64		10.8657		9.83		10.7
10.74		9.78		9.04		8.31		9.01402		9.99		10.61
10.3		10.27		9.77		10.15		10.4757		9.82		10.5
9.99		8.99		9.36		8.38		10.8811		10.12		10.37
9.64		9.42		9.77		9.35		10.5934		9.71		10.77
11.41		9.45		9.55		9.26		11.4993		10.79		10.39
11.5		9.73		9.59		10.23		10.6312		10.4		10.74
10.62		10.02		8.99		8.41		10.7074		9.93		10.96
10.99		10.44		9.64		9.74		11.0492		10.63		10.66
10.16		9.84		9.39		9.13		10.8758		10.1		10.65
11.14		10.54		9.84		9.24		11.3242		10.94		11.93
10.46		10.07		9.65		9.98		9.75322		9.5		11.23
9.93		9.72		10.35		8.42		10.0993		10.75		11.29
11.6		9.79		9.01		8.58		11.2755		10.1		10.88
11.74		9.68		9.33		8.52		10.7977		10.11		10.21
10.95		9.86		9.11		8.19		9.42627		10.12		10.49
10.91		10.12		9.5		9.94		11.3598		9.73		10.88
11.01		10.16		9.7		8.86		11.683		9.79		10.28
10.95		9.45		10.01		9.55		10.0967		10.56		10.68
11.48		10.33		9.6		9.72		10.224		11.3		12.02
12.48		9.33		10.31		10.28		12.4497		9.97		9.87
11.95		9.58		9.05		8.76		11.4435		10.25		10.44
11.85		9.7		9.66		9.18		10.3354		10.32		10.62
10.79		9.71		9.6		9.56		9.94105		10.56		11.38
10.12		9.92		8.99		9.46		10.676		9.73		11.05
11.56		9.77		10.12		9.15		10.3598		10.49		10.64
10.37		9.88		9.95		8.42		10.7756		10.59		10.81
11.61		9.89		9.45		9.49		10.8979		9.71		11.16
10.88		9.26		10.1		8.66		10.5536		9.7		11.12
10.17		10.09		9.05		9.23		11.0042		9.91		10.04
10.93		8.28		9.58		8.66		8.77149		10.01		11.51
10.32		9.97		9.46		8.15		10.2107		10.17		9.93
10.76		9.95		9.69		9.37		11.2149		10.25		10.17
11.85		9.94		10.42		9.36		10.7074		10.04		10.4
12.52		9.86		9.37		9.29		10.4051		9.99		10.85
12.05		9.92		9.84		9.88		10.2574		10.36		10.85
10.99		10.15		9.85		9.31		10.5651		9.8		11.04
11.6		9.85		9.91		9.88		11.1267		10.7		10.85
10.93		9.51		9.58		8.95		9.57932		9.56		10.63
11.19		9.6		9.25		8.82		10.9865		10.52		11.09
11.99		10.08		9.24		8.51		11.568		10.43		11.29
12.38		9.98		9.95		11.61		10.4419		10.06		10.44
10.81		9.22		9.33		8.27		10.5999		10.21		9.83
10.3		10		9.85		8.66		11		9.92		10.98
11.51		10		9.34		9.31		10.6448		10.03		10.97
11.25		10.09		9.36		8.76		12.0109		10.12		10.77
10.97		10.31		9.62		9.08		10.5196		9.78		10.75
10.43		10.18		9.16		8.69		11.0573		9.9		10.19
10.13		9.96		9.83		8.88		11.0961		9.67		11.14
12.15		9.51		11.45		10.27		11.5231		9.44		10.13
12.33		8.77		9.97		9.66		10.2384		9.5		9.67
11.42		10.01		9.76		9.09		9.72622		9.88		11.55
10.89		10.13		9.67		8.92		10.9196		10.33		10.79
10.73		8.86		9.94		9.66		10.4605		9.93		10.84
11.29		9.22		9.17		8.94		11.0967		9.51		10.6
11.14		9.06		9.53		9.39		9.73471		10.16		10.37
12.51		9.82		9.96		9.92		11.9155		9.94		10.38
10.74		10		9.51		9		11.7108		9.4		10.59
9.75		9.48		10.4		9.35		9.37504		9.05		10.18
11.18		9.63		9.04		8.54		9.72792		9.92		10.85
10.64		9.3		9.81		9.96		10.5117		11.06		11.1
11.14		9.06		9.92		7.75		10.9564		9.77		9.35
11.39		9.85		9.79		10.17		11.2726		10.56		10.6
11.3		9.61		9.62		9.66		9.47371		10.27		10.54
10.27		9.65		9.9		9.79		11.5651		9.63		9.86
11.36		9.32		9.89		9.4		12.8617		9.97		10.13
11.48		9.6		9.56		9.02		10.242		9.44		8.93
11.73		9.63		9.69		9.62		10.5333		9.29		9.68
10.2		9.81		9.53		8.43		9.52943		10.02		10.85
10.84		10.22		9.72		9.1		11.1248		9.9		10.62
11.92		10.18		10.41		10.42		10.4346		10.73		10.23
11.66		9.89		10.47		10.52		9.67772		10.51		10.68
11.45		9.88		10.27		8.6		10.6357		10.04		11.02
10.61		10.25		9.39		8.66		8.92481		9.6		10.15
11.86		9.61		10		9.99		12.1586		9.76		10.65
11.78		9.32		10.53		9.54		10.5167		10.37		10.39
11.8		9.79		10.13		10.12		10.9593		9.82		9.29
10.36		10.48		10.36		8.91		9.83289		11.83		10.59
10.48		9.99		9.26		8.66		12.0185		9.78		10.46
11.07		10.86		10.14		9.71		10.1561		10.53		10.44
10.46		10.13		9.43		8.53		9.98299		9.91		10.32
10.75		9.35		10.63		9.15		10.599		10.06		10.25
11.32		9.49		9.56		9.47		10.1228		9.2		10.17
11.71		9.43		9.81		8.88		10.8788		10.19		10.51
								10.4126
								9.71596
								10.8819
								10.5018
								10.5897
								11.1111
								11.0231
								10.7507
								8.97728
								10.952
								11.0265
								10.9651
								10.1447
								10.7507
								9.91139
								12.0964
								10.821
								10.5294
								10.9248
								11.4257
								10.3174
								10.043
								10.3815
								11.1618
								10.7524
								9.53722
								10.2396
								12.3194
								10.5887
								11.4507
								10.9016
								10.3826
								10.1215
								10.4126
								9.56796
								10.0808
								11.1228
								11.8884
								8.83289
								10.6662
								8.78136
								9.46964
								10.3987
								11.5226
								11.9458
								9.54496
								9.88264
								12.2871
								11.3089
								11.0861
								10.7532
								11.0307
								10.3264
								9.98869
								10.2691
								10.268
								9.45327
								11.4686
								10.2923
								11.2161
								11.0458
								10.9196
								10.2668
								10.3674
								10.3761
								11.0471
								10.8963
								10.5216
								10.4848
								10.3219
								9.58308
								10.42
								10.4656

## Sheet: CPSF1
	Sensitivity%	95% CI	Specificity%	95% CI	Likelihood ratio
< 9.570	0	0.000% to 7.270%	99.72	98.40% to 99.99%	0
< 9.645	0	0.000% to 7.270%	99.43	97.95% to 99.90%	0
< 9.695	0	0.000% to 7.270%	99.15	97.52% to 99.77%	0
< 9.745	2.041	0.1047% to 10.69%	98.86	97.11% to 99.56%	1.791
< 9.755	4.082	0.7252% to 13.71%	98.58	96.71% to 99.39%	2.865
< 9.785	8.163	3.220% to 19.19%	98.29	96.32% to 99.21%	4.776
< 9.825	12.24	5.735% to 24.24%	98.29	96.32% to 99.21%	7.163
< 9.845	12.24	5.735% to 24.24%	98.01	95.94% to 99.03%	6.14
< 9.865	12.24	5.735% to 24.24%	97.72	95.57% to 98.84%	5.372
< 9.885	14.29	7.096% to 26.67%	97.72	95.57% to 98.84%	6.268
< 9.910	14.29	7.096% to 26.67%	97.15	94.84% to 98.45%	5.014
< 9.935	16.33	8.513% to 29.04%	96.87	94.48% to 98.24%	5.21
< 9.945	16.33	8.513% to 29.04%	96.01	93.42% to 97.61%	4.093
< 9.965	18.37	9.976% to 31.36%	95.44	92.72% to 97.17%	4.029
< 9.985	20.41	11.48% to 33.64%	95.16	92.38% to 96.95%	4.214
< 10.00	20.41	11.48% to 33.64%	94.87	92.04% to 96.73%	3.98
< 10.02	24.49	14.60% to 38.09%	94.59	91.70% to 96.51%	4.524
< 10.03	26.53	16.21% to 40.26%	94.59	91.70% to 96.51%	4.901
< 10.04	28.57	17.85% to 42.41%	94.59	91.70% to 96.51%	5.278
< 10.06	28.57	17.85% to 42.41%	94.3	91.36% to 96.28%	5.014
< 10.08	28.57	17.85% to 42.41%	94.02	91.03% to 96.05%	4.776
< 10.09	30.61	19.52% to 44.53%	94.02	91.03% to 96.05%	5.117
< 10.10	30.61	19.52% to 44.53%	93.16	90.03% to 95.36%	4.477
< 10.12	30.61	19.52% to 44.53%	92.88	89.70% to 95.13%	4.298
< 10.13	30.61	19.52% to 44.53%	92.59	89.37% to 94.90%	4.133
< 10.14	34.69	22.92% to 48.69%	92.31	89.04% to 94.66%	4.51
< 10.15	36.73	24.67% to 50.73%	92.31	89.04% to 94.66%	4.776
< 10.16	36.73	24.67% to 50.73%	92.02	88.71% to 94.42%	4.605
< 10.17	36.73	24.67% to 50.73%	91.45	88.06% to 93.95%	4.298
< 10.19	38.78	26.43% to 52.75%	91.17	87.74% to 93.71%	4.39
< 10.21	38.78	26.43% to 52.75%	90.88	87.41% to 93.47%	4.253
< 10.22	38.78	26.43% to 52.75%	90.6	87.09% to 93.23%	4.124
< 10.24	40.82	28.22% to 54.75%	89.46	85.81% to 92.26%	3.872
< 10.25	42.86	30.02% to 56.73%	89.46	85.81% to 92.26%	4.066
< 10.26	44.9	31.85% to 58.68%	89.46	85.81% to 92.26%	4.259
< 10.28	46.94	33.70% to 60.62%	88.89	85.17% to 91.76%	4.224
< 10.29	48.98	35.58% to 62.53%	88.32	84.54% to 91.27%	4.193
< 10.30	51.02	37.47% to 64.42%	88.32	84.54% to 91.27%	4.368
< 10.31	51.02	37.47% to 64.42%	87.75	83.90% to 90.78%	4.165
< 10.33	53.06	39.38% to 66.30%	87.46	83.59% to 90.53%	4.233
< 10.34	57.14	43.27% to 69.98%	87.18	83.28% to 90.28%	4.457
< 10.36	57.14	43.27% to 69.98%	86.89	82.96% to 90.03%	4.36
< 10.37	57.14	43.27% to 69.98%	86.32	82.34% to 89.53%	4.179
< 10.38	57.14	43.27% to 69.98%	85.75	81.71% to 89.03%	4.011
< 10.39	57.14	43.27% to 69.98%	85.19	81.09% to 88.52%	3.857
< 10.41	59.18	45.25% to 71.78%	84.33	80.16% to 87.76%	3.777
< 10.42	61.22	47.25% to 73.57%	84.05	79.85% to 87.50%	3.837
< 10.43	63.27	49.27% to 75.33%	82.91	78.62% to 86.48%	3.701
< 10.44	63.27	49.27% to 75.33%	82.05	77.70% to 85.71%	3.525
< 10.45	65.31	51.31% to 77.08%	81.77	77.39% to 85.45%	3.582
< 10.46	65.31	51.31% to 77.08%	80.91	76.47% to 84.68%	3.421
< 10.47	67.35	53.38% to 78.79%	80.34	75.87% to 84.16%	3.426
< 10.48	67.35	53.38% to 78.79%	80.06	75.56% to 83.90%	3.377
< 10.49	67.35	53.38% to 78.79%	79.49	74.95% to 83.38%	3.283
< 10.50	69.39	55.47% to 80.48%	78.63	74.05% to 82.60%	3.247
< 10.51	69.39	55.47% to 80.48%	77.78	73.14% to 81.81%	3.122
< 10.52	71.43	57.59% to 82.15%	77.78	73.14% to 81.81%	3.214
< 10.53	71.43	57.59% to 82.15%	77.49	72.84% to 81.55%	3.174
< 10.54	71.43	57.59% to 82.15%	76.64	71.94% to 80.76%	3.057
< 10.55	75.51	61.91% to 85.40%	75.78	71.04% to 79.97%	3.118
< 10.57	77.55	64.12% to 86.98%	75.5	70.74% to 79.71%	3.165
< 10.58	81.63	68.64% to 90.02%	75.21	70.44% to 79.44%	3.293
< 10.60	83.67	70.96% to 91.49%	74.93	70.14% to 79.18%	3.337
< 10.61	83.67	70.96% to 91.49%	74.36	69.54% to 78.65%	3.263
< 10.62	85.71	73.33% to 92.90%	73.5	68.65% to 77.85%	3.235
< 10.63	85.71	73.33% to 92.90%	72.93	68.06% to 77.32%	3.167
< 10.64	85.71	73.33% to 92.90%	72.08	67.17% to 76.51%	3.07
< 10.65	85.71	73.33% to 92.90%	71.51	66.57% to 75.98%	3.009
< 10.67	85.71	73.33% to 92.90%	71.23	66.28% to 75.71%	2.979
< 10.68	85.71	73.33% to 92.90%	70.94	65.98% to 75.44%	2.95
< 10.69	87.76	75.76% to 94.27%	70.66	65.69% to 75.17%	2.99
< 10.70	87.76	75.76% to 94.27%	70.37	65.39% to 74.91%	2.962
< 10.71	89.8	78.24% to 95.56%	69.52	64.51% to 74.10%	2.946
< 10.72	89.8	78.24% to 95.56%	68.38	63.33% to 73.02%	2.839
< 10.73	89.8	78.24% to 95.56%	67.24	62.16% to 71.94%	2.741
< 10.74	89.8	78.24% to 95.56%	66.1	60.99% to 70.85%	2.649
< 10.75	89.8	78.24% to 95.56%	64.67	59.54% to 69.49%	2.542
< 10.76	91.84	80.81% to 96.78%	63.25	58.09% to 68.12%	2.499
< 10.77	91.84	80.81% to 96.78%	62.68	57.51% to 67.58%	2.461
< 10.78	97.96	89.31% to 99.90%	62.68	57.51% to 67.58%	2.625
< 10.79	97.96	89.31% to 99.90%	62.39	57.22% to 67.30%	2.605
< 10.80	97.96	89.31% to 99.90%	61.54	56.35% to 66.48%	2.547
< 10.81	97.96	89.31% to 99.90%	60.97	55.77% to 65.93%	2.51
< 10.82	97.96	89.31% to 99.90%	60.4	55.20% to 65.38%	2.474
< 10.83	97.96	89.31% to 99.90%	60.11	54.91% to 65.10%	2.456
< 10.84	97.96	89.31% to 99.90%	59.83	54.62% to 64.82%	2.439
< 10.85	97.96	89.31% to 99.90%	58.97	53.76% to 64.00%	2.388
< 10.86	97.96	89.31% to 99.90%	58.4	53.18% to 63.44%	2.355
< 10.87	97.96	89.31% to 99.90%	57.83	52.61% to 62.89%	2.323
< 10.89	97.96	89.31% to 99.90%	56.98	51.75% to 62.06%	2.277
< 10.90	97.96	89.31% to 99.90%	56.41	51.18% to 61.50%	2.247
< 10.91	97.96	89.31% to 99.90%	55.84	50.61% to 60.94%	2.218
< 10.92	97.96	89.31% to 99.90%	55.56	50.32% to 60.67%	2.204
< 10.93	97.96	89.31% to 99.90%	54.99	49.76% to 60.11%	2.176
< 10.94	97.96	89.31% to 99.90%	53.56	48.33% to 58.71%	2.109
< 10.95	97.96	89.31% to 99.90%	53.28	48.05% to 58.43%	2.097
< 10.96	97.96	89.31% to 99.90%	52.14	46.92% to 57.31%	2.047
< 10.97	100	92.73% to 100.0%	51.85	46.63% to 57.03%	2.077
< 10.98	100	92.73% to 100.0%	51.28	46.07% to 56.47%	2.053
< 10.99	100	92.73% to 100.0%	51	45.79% to 56.19%	2.041
< 11.00	100	92.73% to 100.0%	49.86	44.66% to 55.06%	1.994
< 11.01	100	92.73% to 100.0%	49	43.81% to 54.21%	1.961
< 11.02	100	92.73% to 100.0%	48.43	43.25% to 53.65%	1.939
< 11.03	100	92.73% to 100.0%	47.86	42.69% to 53.08%	1.918
< 11.04	100	92.73% to 100.0%	47.58	42.41% to 52.80%	1.908
< 11.05	100	92.73% to 100.0%	47.29	42.13% to 52.52%	1.897
< 11.06	100	92.73% to 100.0%	47.01	41.85% to 52.23%	1.887
< 11.07	100	92.73% to 100.0%	46.44	41.29% to 51.67%	1.867
< 11.08	100	92.73% to 100.0%	45.87	40.73% to 51.10%	1.847
< 11.09	100	92.73% to 100.0%	45.58	40.45% to 50.81%	1.838
< 11.10	100	92.73% to 100.0%	45.01	39.89% to 50.24%	1.819
< 11.11	100	92.73% to 100.0%	44.73	39.61% to 49.96%	1.809
< 11.13	100	92.73% to 100.0%	44.16	39.06% to 49.39%	1.791
< 11.15	100	92.73% to 100.0%	43.3	38.22% to 48.53%	1.764
< 11.16	100	92.73% to 100.0%	42.74	37.67% to 47.96%	1.746
< 11.17	100	92.73% to 100.0%	42.45	37.39% to 47.68%	1.738
< 11.18	100	92.73% to 100.0%	41.6	36.56% to 46.82%	1.712
< 11.19	100	92.73% to 100.0%	40.74	35.73% to 45.95%	1.688
< 11.20	100	92.73% to 100.0%	40.46	35.45% to 45.67%	1.679
< 11.21	100	92.73% to 100.0%	40.17	35.18% to 45.38%	1.671
< 11.22	100	92.73% to 100.0%	39.03	34.07% to 44.23%	1.64
< 11.23	100	92.73% to 100.0%	37.89	32.97% to 43.07%	1.61
< 11.25	100	92.73% to 100.0%	37.61	32.70% to 42.78%	1.603
< 11.26	100	92.73% to 100.0%	37.04	32.15% to 42.20%	1.588
< 11.27	100	92.73% to 100.0%	36.75	31.88% to 41.91%	1.581
< 11.28	100	92.73% to 100.0%	36.47	31.60% to 41.62%	1.574
< 11.29	100	92.73% to 100.0%	36.18	31.33% to 41.33%	1.567
< 11.30	100	92.73% to 100.0%	35.61	30.78% to 40.75%	1.553
< 11.31	100	92.73% to 100.0%	34.76	29.97% to 39.88%	1.533
< 11.32	100	92.73% to 100.0%	34.47	29.69% to 39.59%	1.526
< 11.33	100	92.73% to 100.0%	33.9	29.15% to 39.01%	1.513
< 11.34	100	92.73% to 100.0%	32.76	28.06% to 37.84%	1.487
< 11.35	100	92.73% to 100.0%	32.48	27.79% to 37.54%	1.481
< 11.36	100	92.73% to 100.0%	31.62	26.98% to 36.67%	1.463
< 11.37	100	92.73% to 100.0%	31.34	26.71% to 36.37%	1.456
< 11.38	100	92.73% to 100.0%	31.05	26.44% to 36.08%	1.45
< 11.39	100	92.73% to 100.0%	30.48	25.90% to 35.49%	1.439
< 11.40	100	92.73% to 100.0%	29.63	25.09% to 34.61%	1.421
< 11.41	100	92.73% to 100.0%	29.34	24.83% to 34.31%	1.415
< 11.42	100	92.73% to 100.0%	29.06	24.56% to 34.02%	1.41
< 11.43	100	92.73% to 100.0%	28.77	24.29% to 33.72%	1.404
< 11.44	100	92.73% to 100.0%	28.49	24.02% to 33.43%	1.398
< 11.45	100	92.73% to 100.0%	28.21	23.75% to 33.13%	1.393
< 11.46	100	92.73% to 100.0%	27.92	23.49% to 32.83%	1.387
< 11.48	100	92.73% to 100.0%	27.64	23.22% to 32.54%	1.382
< 11.49	100	92.73% to 100.0%	26.5	22.15% to 31.35%	1.36
< 11.50	100	92.73% to 100.0%	25.64	21.35% to 30.46%	1.345
< 11.51	100	92.73% to 100.0%	25.07	20.82% to 29.86%	1.335
< 11.52	100	92.73% to 100.0%	24.79	20.56% to 29.56%	1.33
< 11.53	100	92.73% to 100.0%	24.5	20.29% to 29.26%	1.325
< 11.54	100	92.73% to 100.0%	24.22	20.03% to 28.96%	1.32
< 11.55	100	92.73% to 100.0%	23.93	19.77% to 28.66%	1.315
< 11.56	100	92.73% to 100.0%	23.65	19.50% to 28.36%	1.31
< 11.57	100	92.73% to 100.0%	22.51	18.45% to 27.16%	1.29
< 11.58	100	92.73% to 100.0%	22.22	18.19% to 26.86%	1.286
< 11.59	100	92.73% to 100.0%	21.94	17.92% to 26.56%	1.281
< 11.60	100	92.73% to 100.0%	21.37	17.40% to 25.95%	1.272
< 11.61	100	92.73% to 100.0%	20.51	16.62% to 25.05%	1.258
< 11.63	100	92.73% to 100.0%	19.94	16.10% to 24.44%	1.249
< 11.66	100	92.73% to 100.0%	19.37	15.58% to 23.83%	1.24
< 11.67	100	92.73% to 100.0%	18.52	14.80% to 22.92%	1.227
< 11.68	100	92.73% to 100.0%	17.66	14.03% to 22.00%	1.215
< 11.70	100	92.73% to 100.0%	17.38	13.77% to 21.69%	1.21
< 11.72	100	92.73% to 100.0%	16.81	13.26% to 21.08%	1.202
< 11.73	100	92.73% to 100.0%	16.52	13.01% to 20.77%	1.198
< 11.74	100	92.73% to 100.0%	15.95	12.50% to 20.15%	1.19
< 11.75	100	92.73% to 100.0%	15.38	11.99% to 19.53%	1.182
< 11.77	100	92.73% to 100.0%	15.1	11.73% to 19.22%	1.178
< 11.79	100	92.73% to 100.0%	14.53	11.23% to 18.60%	1.17
< 11.80	100	92.73% to 100.0%	14.25	10.97% to 18.29%	1.166
< 11.81	100	92.73% to 100.0%	13.96	10.72% to 17.98%	1.162
< 11.82	100	92.73% to 100.0%	13.68	10.47% to 17.66%	1.158
< 11.83	100	92.73% to 100.0%	13.11	9.971% to 17.04%	1.151
< 11.85	100	92.73% to 100.0%	12.82	9.721% to 16.72%	1.147
< 11.86	100	92.73% to 100.0%	11.97	8.976% to 15.78%	1.136
< 11.87	100	92.73% to 100.0%	11.4	8.481% to 15.15%	1.129
< 11.88	100	92.73% to 100.0%	11.11	8.235% to 14.83%	1.125
< 11.89	100	92.73% to 100.0%	10.83	7.990% to 14.51%	1.121
< 11.91	100	92.73% to 100.0%	10.26	7.501% to 13.87%	1.114
< 11.93	100	92.73% to 100.0%	9.972	7.257% to 13.55%	1.111
< 11.94	100	92.73% to 100.0%	9.687	7.015% to 13.23%	1.107
< 11.97	100	92.73% to 100.0%	9.402	6.773% to 12.91%	1.104
< 12.01	100	92.73% to 100.0%	8.832	6.292% to 12.26%	1.097
< 12.03	100	92.73% to 100.0%	8.547	6.052% to 11.94%	1.093
< 12.04	100	92.73% to 100.0%	8.262	5.814% to 11.61%	1.09
< 12.05	100	92.73% to 100.0%	7.692	5.340% to 10.96%	1.083
< 12.06	100	92.73% to 100.0%	7.123	4.871% to 10.30%	1.077
< 12.10	100	92.73% to 100.0%	6.838	4.638% to 9.972%	1.073
< 12.13	100	92.73% to 100.0%	6.553	4.406% to 9.640%	1.07
< 12.15	100	92.73% to 100.0%	5.983	3.946% to 8.973%	1.064
< 12.16	100	92.73% to 100.0%	5.698	3.719% to 8.637%	1.06
< 12.18	100	92.73% to 100.0%	5.413	3.492% to 8.299%	1.057
< 12.19	100	92.73% to 100.0%	4.843	3.046% to 7.619%	1.051
< 12.23	100	92.73% to 100.0%	4.558	2.825% to 7.276%	1.048
< 12.30	100	92.73% to 100.0%	3.989	2.391% to 6.583%	1.042
< 12.33	100	92.73% to 100.0%	3.704	2.177% to 6.233%	1.038
< 12.34	100	92.73% to 100.0%	3.419	1.966% to 5.880%	1.035
< 12.35	100	92.73% to 100.0%	3.134	1.759% to 5.524%	1.032
< 12.37	100	92.73% to 100.0%	2.849	1.555% to 5.164%	1.029
< 12.40	100	92.73% to 100.0%	2.564	1.355% to 4.801%	1.026
< 12.45	100	92.73% to 100.0%	2.279	1.159% to 4.432%	1.023
< 12.50	100	92.73% to 100.0%	1.994	0.9693% to 4.059%	1.02
< 12.52	100	92.73% to 100.0%	1.709	0.7857% to 3.679%	1.017
< 12.54	100	92.73% to 100.0%	1.425	0.6100% to 3.291%	1.014
< 12.63	100	92.73% to 100.0%	1.14	0.4440% to 2.893%	1.012
< 12.86	100	92.73% to 100.0%	0.8547	0.2330% to 2.482%	1.009
< 13.07	100	92.73% to 100.0%	0.5698	0.1012% to 2.053%	1.006
< 13.24	100	92.73% to 100.0%	0.2849	0.01461% to 1.596%	1.003

## Sheet: CPSF2
	Sensitivity%	95% CI	Specificity%	95% CI	Likelihood ratio
< 8.260	0	0.000% to 7.270%	99.72	98.40% to 99.99%	0
< 8.320	0	0.000% to 7.270%	99.43	97.95% to 99.90%	0
< 8.450	0	0.000% to 7.270%	99.15	97.52% to 99.77%	0
< 8.560	0	0.000% to 7.270%	98.86	97.11% to 99.56%	0
< 8.630	0	0.000% to 7.270%	98.58	96.71% to 99.39%	0
< 8.690	0	0.000% to 7.270%	98.29	96.32% to 99.21%	0
< 8.735	0	0.000% to 7.270%	98.01	95.94% to 99.03%	0
< 8.780	0	0.000% to 7.270%	97.72	95.57% to 98.84%	0
< 8.800	0	0.000% to 7.270%	97.44	95.20% to 98.65%	0
< 8.825	0	0.000% to 7.270%	97.15	94.84% to 98.45%	0
< 8.850	0	0.000% to 7.270%	96.58	94.12% to 98.03%	0
< 8.910	0	0.000% to 7.270%	96.01	93.42% to 97.61%	0
< 8.970	0	0.000% to 7.270%	95.73	93.07% to 97.39%	0
< 8.985	0	0.000% to 7.270%	95.16	92.38% to 96.95%	0
< 9.010	0	0.000% to 7.270%	94.87	92.04% to 96.73%	0
< 9.045	0	0.000% to 7.270%	94.59	91.70% to 96.51%	0
< 9.085	0	0.000% to 7.270%	94.02	91.03% to 96.05%	0
< 9.115	0	0.000% to 7.270%	93.73	90.69% to 95.82%	0
< 9.130	0	0.000% to 7.270%	93.45	90.36% to 95.59%	0
< 9.145	0	0.000% to 7.270%	93.16	90.03% to 95.36%	0
< 9.155	0	0.000% to 7.270%	92.88	89.70% to 95.13%	0
< 9.165	2.041	0.1047% to 10.69%	92.88	89.70% to 95.13%	0.2865
< 9.180	4.082	0.7252% to 13.71%	92.88	89.70% to 95.13%	0.5731
< 9.195	4.082	0.7252% to 13.71%	92.59	89.37% to 94.90%	0.551
< 9.205	4.082	0.7252% to 13.71%	92.31	89.04% to 94.66%	0.5306
< 9.215	4.082	0.7252% to 13.71%	92.02	88.71% to 94.42%	0.5117
< 9.225	4.082	0.7252% to 13.71%	90.88	87.41% to 93.47%	0.4477
< 9.245	4.082	0.7252% to 13.71%	90.6	87.09% to 93.23%	0.4341
< 9.265	4.082	0.7252% to 13.71%	90.03	86.45% to 92.74%	0.4093
< 9.275	6.122	2.104% to 16.52%	89.46	85.81% to 92.26%	0.5808
< 9.285	6.122	2.104% to 16.52%	88.32	84.54% to 91.27%	0.5241
< 9.295	6.122	2.104% to 16.52%	88.03	84.22% to 91.02%	0.5117
< 9.305	6.122	2.104% to 16.52%	86.89	82.96% to 90.03%	0.4672
< 9.315	6.122	2.104% to 16.52%	86.32	82.34% to 89.53%	0.4477
< 9.325	6.122	2.104% to 16.52%	85.75	81.71% to 89.03%	0.4298
< 9.340	6.122	2.104% to 16.52%	85.19	81.09% to 88.52%	0.4133
< 9.355	6.122	2.104% to 16.52%	84.62	80.47% to 88.01%	0.398
< 9.370	6.122	2.104% to 16.52%	84.33	80.16% to 87.76%	0.3907
< 9.385	8.163	3.220% to 19.19%	84.33	80.16% to 87.76%	0.521
< 9.400	8.163	3.220% to 19.19%	84.05	79.85% to 87.50%	0.5117
< 9.415	12.24	5.735% to 24.24%	83.48	79.23% to 86.99%	0.741
< 9.425	12.24	5.735% to 24.24%	82.91	78.62% to 86.48%	0.7163
< 9.435	12.24	5.735% to 24.24%	82.34	78.00% to 85.97%	0.6932
< 9.445	12.24	5.735% to 24.24%	82.05	77.70% to 85.71%	0.6822
< 9.455	12.24	5.735% to 24.24%	81.48	77.08% to 85.20%	0.6612
< 9.465	12.24	5.735% to 24.24%	80.91	76.47% to 84.68%	0.6415
< 9.475	12.24	5.735% to 24.24%	80.63	76.17% to 84.42%	0.6321
< 9.485	12.24	5.735% to 24.24%	79.77	75.26% to 83.64%	0.6053
< 9.495	12.24	5.735% to 24.24%	79.2	74.65% to 83.12%	0.5888
< 9.505	14.29	7.096% to 26.67%	78.06	73.44% to 82.08%	0.6512
< 9.515	16.33	8.513% to 29.04%	77.21	72.54% to 81.29%	0.7163
< 9.525	16.33	8.513% to 29.04%	76.64	71.94% to 80.76%	0.6989
< 9.535	20.41	11.48% to 33.64%	75.78	71.04% to 79.97%	0.8427
< 9.550	20.41	11.48% to 33.64%	74.93	70.14% to 79.18%	0.814
< 9.565	22.45	13.02% to 35.88%	74.36	69.54% to 78.65%	0.8755
< 9.575	24.49	14.60% to 38.09%	73.79	68.95% to 78.11%	0.9343
< 9.585	24.49	14.60% to 38.09%	72.93	68.06% to 77.32%	0.9048
< 9.595	28.57	17.85% to 42.41%	71.79	66.87% to 76.25%	1.013
< 9.605	30.61	19.52% to 44.53%	70.09	65.10% to 74.64%	1.023
< 9.615	30.61	19.52% to 44.53%	69.52	64.51% to 74.10%	1.004
< 9.625	32.65	21.21% to 46.62%	69.23	64.22% to 73.83%	1.061
< 9.635	32.65	21.21% to 46.62%	68.09	63.04% to 72.75%	1.023
< 9.645	34.69	22.92% to 48.69%	68.09	63.04% to 72.75%	1.087
< 9.655	34.69	22.92% to 48.69%	67.24	62.16% to 71.94%	1.059
< 9.665	34.69	22.92% to 48.69%	66.95	61.87% to 71.67%	1.05
< 9.675	36.73	24.67% to 50.73%	66.1	60.99% to 70.85%	1.084
< 9.685	40.82	28.22% to 54.75%	65.24	60.12% to 70.03%	1.174
< 9.695	40.82	28.22% to 54.75%	64.67	59.54% to 69.49%	1.155
< 9.705	40.82	28.22% to 54.75%	64.1	58.96% to 68.94%	1.137
< 9.715	44.9	31.85% to 58.68%	62.96	57.80% to 67.85%	1.212
< 9.725	44.9	31.85% to 58.68%	61.82	56.64% to 66.75%	1.176
< 9.735	46.94	33.70% to 60.62%	60.68	55.48% to 65.65%	1.194
< 9.745	48.98	35.58% to 62.53%	60.11	54.91% to 65.10%	1.228
< 9.755	48.98	35.58% to 62.53%	59.26	54.05% to 64.27%	1.202
< 9.765	53.06	39.38% to 66.30%	57.83	52.61% to 62.89%	1.258
< 9.775	53.06	39.38% to 66.30%	56.7	51.47% to 61.78%	1.225
< 9.785	55.1	41.32% to 68.15%	55.56	50.32% to 60.67%	1.24
< 9.795	55.1	41.32% to 68.15%	54.7	49.47% to 59.83%	1.216
< 9.805	59.18	45.25% to 71.78%	53.56	48.33% to 58.71%	1.274
< 9.815	61.22	47.25% to 73.57%	52.71	47.48% to 57.87%	1.295
< 9.825	63.27	49.27% to 75.33%	51.28	46.07% to 56.47%	1.299
< 9.835	65.31	51.31% to 77.08%	51	45.79% to 56.19%	1.333
< 9.845	65.31	51.31% to 77.08%	49.86	44.66% to 55.06%	1.302
< 9.855	65.31	51.31% to 77.08%	48.72	43.53% to 53.93%	1.273
< 9.865	67.35	53.38% to 78.79%	48.15	42.97% to 53.37%	1.299
< 9.875	71.43	57.59% to 82.15%	45.87	40.73% to 51.10%	1.32
< 9.885	75.51	61.91% to 85.40%	44.44	39.33% to 49.68%	1.359
< 9.895	75.51	61.91% to 85.40%	43.02	37.94% to 48.25%	1.325
< 9.905	75.51	61.91% to 85.40%	42.17	37.11% to 47.39%	1.306
< 9.915	75.51	61.91% to 85.40%	40.74	35.73% to 45.95%	1.274
< 9.925	77.55	64.12% to 86.98%	39.03	34.07% to 44.23%	1.272
< 9.935	77.55	64.12% to 86.98%	38.18	33.25% to 43.36%	1.254
< 9.945	77.55	64.12% to 86.98%	36.47	31.60% to 41.62%	1.221
< 9.955	79.59	66.36% to 88.52%	35.61	30.78% to 40.75%	1.236
< 9.965	79.59	66.36% to 88.52%	34.19	29.42% to 39.30%	1.209
< 9.975	81.63	68.64% to 90.02%	33.62	28.88% to 38.71%	1.23
< 9.985	83.67	70.96% to 91.49%	32.19	27.52% to 37.25%	1.234
< 9.995	83.67	70.96% to 91.49%	30.77	26.17% to 35.78%	1.209
< 10.01	83.67	70.96% to 91.49%	29.63	25.09% to 34.61%	1.189
< 10.02	85.71	73.33% to 92.90%	28.77	24.29% to 33.72%	1.203
< 10.03	85.71	73.33% to 92.90%	28.21	23.75% to 33.13%	1.194
< 10.05	87.76	75.76% to 94.27%	27.35	22.95% to 32.24%	1.208
< 10.06	87.76	75.76% to 94.27%	26.5	22.15% to 31.35%	1.194
< 10.07	87.76	75.76% to 94.27%	25.07	20.82% to 29.86%	1.171
< 10.08	87.76	75.76% to 94.27%	23.93	19.77% to 28.66%	1.154
< 10.09	89.8	78.24% to 95.56%	22.79	18.71% to 27.46%	1.163
< 10.10	91.84	80.81% to 96.78%	21.37	17.40% to 25.95%	1.168
< 10.11	93.88	83.48% to 97.90%	20.51	16.62% to 25.05%	1.181
< 10.12	93.88	83.48% to 97.90%	20.23	16.36% to 24.74%	1.177
< 10.13	93.88	83.48% to 97.90%	18.8	15.06% to 23.22%	1.156
< 10.14	93.88	83.48% to 97.90%	17.95	14.29% to 22.30%	1.144
< 10.15	95.92	86.29% to 99.27%	16.81	13.26% to 21.08%	1.153
< 10.16	95.92	86.29% to 99.27%	15.95	12.50% to 20.15%	1.141
< 10.17	95.92	86.29% to 99.27%	15.1	11.73% to 19.22%	1.13
< 10.18	95.92	86.29% to 99.27%	14.25	10.97% to 18.29%	1.119
< 10.19	95.92	86.29% to 99.27%	13.39	10.22% to 17.35%	1.107
< 10.21	95.92	86.29% to 99.27%	12.54	9.472% to 16.41%	1.097
< 10.23	97.96	89.31% to 99.90%	12.25	9.224% to 16.10%	1.116
< 10.25	97.96	89.31% to 99.90%	11.97	8.976% to 15.78%	1.113
< 10.26	100	92.73% to 100.0%	11.11	8.235% to 14.83%	1.125
< 10.27	100	92.73% to 100.0%	10.54	7.745% to 14.19%	1.118
< 10.28	100	92.73% to 100.0%	10.26	7.501% to 13.87%	1.114
< 10.29	100	92.73% to 100.0%	9.402	6.773% to 12.91%	1.104
< 10.30	100	92.73% to 100.0%	8.262	5.814% to 11.61%	1.09
< 10.31	100	92.73% to 100.0%	7.977	5.577% to 11.29%	1.087
< 10.32	100	92.73% to 100.0%	7.692	5.340% to 10.96%	1.083
< 10.33	100	92.73% to 100.0%	7.407	5.105% to 10.63%	1.08
< 10.34	100	92.73% to 100.0%	7.123	4.871% to 10.30%	1.077
< 10.35	100	92.73% to 100.0%	6.838	4.638% to 9.972%	1.073
< 10.38	100	92.73% to 100.0%	6.553	4.406% to 9.640%	1.07
< 10.41	100	92.73% to 100.0%	5.983	3.946% to 8.973%	1.064
< 10.42	100	92.73% to 100.0%	5.698	3.719% to 8.637%	1.06
< 10.43	100	92.73% to 100.0%	5.413	3.492% to 8.299%	1.057
< 10.44	100	92.73% to 100.0%	5.128	3.268% to 7.960%	1.054
< 10.46	100	92.73% to 100.0%	3.989	2.391% to 6.583%	1.042
< 10.48	100	92.73% to 100.0%	3.419	1.966% to 5.880%	1.035
< 10.49	100	92.73% to 100.0%	3.134	1.759% to 5.524%	1.032
< 10.51	100	92.73% to 100.0%	2.849	1.555% to 5.164%	1.029
< 10.53	100	92.73% to 100.0%	2.564	1.355% to 4.801%	1.026
< 10.54	100	92.73% to 100.0%	2.279	1.159% to 4.432%	1.023
< 10.55	100	92.73% to 100.0%	1.994	0.9693% to 4.059%	1.02
< 10.57	100	92.73% to 100.0%	1.709	0.7857% to 3.679%	1.017
< 10.68	100	92.73% to 100.0%	1.425	0.6100% to 3.291%	1.014
< 10.80	100	92.73% to 100.0%	1.14	0.4440% to 2.893%	1.012
< 10.84	100	92.73% to 100.0%	0.5698	0.1012% to 2.053%	1.006

## Sheet: CPSF3
	Sensitivity%	95% CI	Specificity%	95% CI	Likelihood ratio
< 8.720	0	0.000% to 7.270%	99.72	98.40% to 99.99%	0
< 8.755	0	0.000% to 7.270%	99.43	97.95% to 99.90%	0
< 8.770	0	0.000% to 7.270%	99.15	97.52% to 99.77%	0
< 8.805	0	0.000% to 7.270%	98.86	97.11% to 99.56%	0
< 8.850	2.041	0.1047% to 10.69%	98.86	97.11% to 99.56%	1.791
< 8.875	4.082	0.7252% to 13.71%	98.86	97.11% to 99.56%	3.582
< 8.890	6.122	2.104% to 16.52%	98.86	97.11% to 99.56%	5.372
< 8.910	8.163	3.220% to 19.19%	98.58	96.71% to 99.39%	5.731
< 8.925	10.2	4.438% to 21.76%	98.29	96.32% to 99.21%	5.969
< 8.935	10.2	4.438% to 21.76%	97.72	95.57% to 98.84%	4.477
< 8.945	16.33	8.513% to 29.04%	97.72	95.57% to 98.84%	7.163
< 8.960	16.33	8.513% to 29.04%	97.44	95.20% to 98.65%	6.367
< 8.975	16.33	8.513% to 29.04%	97.15	94.84% to 98.45%	5.731
< 8.985	16.33	8.513% to 29.04%	96.87	94.48% to 98.24%	5.21
< 8.995	18.37	9.976% to 31.36%	95.73	93.07% to 97.39%	4.298
< 9.005	20.41	11.48% to 33.64%	95.44	92.72% to 97.17%	4.477
< 9.015	22.45	13.02% to 35.88%	94.59	91.70% to 96.51%	4.147
< 9.025	26.53	16.21% to 40.26%	94.59	91.70% to 96.51%	4.901
< 9.035	26.53	16.21% to 40.26%	94.3	91.36% to 96.28%	4.656
< 9.045	32.65	21.21% to 46.62%	93.73	90.69% to 95.82%	5.21
< 9.055	40.82	28.22% to 54.75%	92.88	89.70% to 95.13%	5.731
< 9.065	46.94	33.70% to 60.62%	92.88	89.70% to 95.13%	6.59
< 9.075	46.94	33.70% to 60.62%	92.59	89.37% to 94.90%	6.337
< 9.085	51.02	37.47% to 64.42%	92.59	89.37% to 94.90%	6.888
< 9.100	53.06	39.38% to 66.30%	92.31	89.04% to 94.66%	6.898
< 9.115	57.14	43.27% to 69.98%	91.45	88.06% to 93.95%	6.686
< 9.125	59.18	45.25% to 71.78%	90.31	86.77% to 92.99%	6.11
< 9.135	63.27	49.27% to 75.33%	90.31	86.77% to 92.99%	6.531
< 9.145	63.27	49.27% to 75.33%	90.03	86.45% to 92.74%	6.345
< 9.155	65.31	51.31% to 77.08%	89.17	85.49% to 92.01%	6.032
< 9.165	67.35	53.38% to 78.79%	88.32	84.54% to 91.27%	5.766
< 9.175	73.47	59.74% to 83.79%	87.18	83.28% to 90.28%	5.731
< 9.185	77.55	64.12% to 86.98%	86.89	82.96% to 90.03%	5.917
< 9.200	81.63	68.64% to 90.02%	86.32	82.34% to 89.53%	5.969
< 9.215	81.63	68.64% to 90.02%	85.75	81.71% to 89.03%	5.731
< 9.225	87.76	75.76% to 94.27%	84.62	80.47% to 88.01%	5.704
< 9.235	87.76	75.76% to 94.27%	84.33	80.16% to 87.76%	5.6
< 9.245	87.76	75.76% to 94.27%	83.48	79.23% to 86.99%	5.311
< 9.255	87.76	75.76% to 94.27%	82.91	78.62% to 86.48%	5.134
< 9.265	87.76	75.76% to 94.27%	81.2	76.78% to 84.94%	4.667
< 9.275	89.8	78.24% to 95.56%	79.77	75.26% to 83.64%	4.439
< 9.285	91.84	80.81% to 96.78%	78.92	74.35% to 82.86%	4.356
< 9.295	91.84	80.81% to 96.78%	77.78	73.14% to 81.81%	4.133
< 9.305	91.84	80.81% to 96.78%	76.92	72.24% to 81.03%	3.98
< 9.315	91.84	80.81% to 96.78%	76.64	71.94% to 80.76%	3.931
< 9.325	91.84	80.81% to 96.78%	76.07	71.34% to 80.23%	3.837
< 9.335	91.84	80.81% to 96.78%	75.21	70.44% to 79.44%	3.705
< 9.345	93.88	83.48% to 97.90%	74.36	69.54% to 78.65%	3.661
< 9.355	93.88	83.48% to 97.90%	73.5	68.65% to 77.85%	3.543
< 9.365	95.92	86.29% to 99.27%	72.36	67.46% to 76.78%	3.471
< 9.375	95.92	86.29% to 99.27%	71.23	66.28% to 75.71%	3.333
< 9.385	95.92	86.29% to 99.27%	69.23	64.22% to 73.83%	3.117
< 9.395	97.96	89.31% to 99.90%	67.24	62.16% to 71.94%	2.99
< 9.405	97.96	89.31% to 99.90%	66.1	60.99% to 70.85%	2.889
< 9.415	97.96	89.31% to 99.90%	65.81	60.70% to 70.58%	2.865
< 9.425	97.96	89.31% to 99.90%	64.67	59.54% to 69.49%	2.773
< 9.435	97.96	89.31% to 99.90%	63.82	58.67% to 68.67%	2.707
< 9.445	97.96	89.31% to 99.90%	63.53	58.38% to 68.40%	2.686
< 9.455	97.96	89.31% to 99.90%	62.68	57.51% to 67.58%	2.625
< 9.465	97.96	89.31% to 99.90%	61.54	56.35% to 66.48%	2.547
< 9.475	97.96	89.31% to 99.90%	60.68	55.48% to 65.65%	2.492
< 9.485	97.96	89.31% to 99.90%	59.26	54.05% to 64.27%	2.404
< 9.495	97.96	89.31% to 99.90%	58.4	53.18% to 63.44%	2.355
< 9.505	100	92.73% to 100.0%	57.83	52.61% to 62.89%	2.372
< 9.515	100	92.73% to 100.0%	56.13	50.90% to 61.22%	2.279
< 9.525	100	92.73% to 100.0%	55.56	50.32% to 60.67%	2.25
< 9.535	100	92.73% to 100.0%	53.85	48.62% to 58.99%	2.167
< 9.545	100	92.73% to 100.0%	52.14	46.92% to 57.31%	2.089
< 9.555	100	92.73% to 100.0%	49.86	44.66% to 55.06%	1.994
< 9.565	100	92.73% to 100.0%	49	43.81% to 54.21%	1.961
< 9.575	100	92.73% to 100.0%	48.43	43.25% to 53.65%	1.939
< 9.585	100	92.73% to 100.0%	47.86	42.69% to 53.08%	1.918
< 9.595	100	92.73% to 100.0%	47.29	42.13% to 52.52%	1.897
< 9.610	100	92.73% to 100.0%	45.87	40.73% to 51.10%	1.847
< 9.625	100	92.73% to 100.0%	44.73	39.61% to 49.96%	1.809
< 9.635	100	92.73% to 100.0%	44.16	39.06% to 49.39%	1.791
< 9.645	100	92.73% to 100.0%	43.02	37.94% to 48.25%	1.755
< 9.655	100	92.73% to 100.0%	42.17	37.11% to 47.39%	1.729
< 9.665	100	92.73% to 100.0%	41.6	36.56% to 46.82%	1.712
< 9.675	100	92.73% to 100.0%	40.17	35.18% to 45.38%	1.671
< 9.685	100	92.73% to 100.0%	39.03	34.07% to 44.23%	1.64
< 9.695	100	92.73% to 100.0%	37.89	32.97% to 43.07%	1.61
< 9.705	100	92.73% to 100.0%	37.04	32.15% to 42.20%	1.588
< 9.715	100	92.73% to 100.0%	36.18	31.33% to 41.33%	1.567
< 9.725	100	92.73% to 100.0%	35.04	30.24% to 40.17%	1.539
< 9.735	100	92.73% to 100.0%	34.19	29.42% to 39.30%	1.519
< 9.745	100	92.73% to 100.0%	33.05	28.33% to 38.13%	1.494
< 9.755	100	92.73% to 100.0%	32.48	27.79% to 37.54%	1.481
< 9.765	100	92.73% to 100.0%	31.05	26.44% to 36.08%	1.45
< 9.775	100	92.73% to 100.0%	30.2	25.63% to 35.20%	1.433
< 9.785	100	92.73% to 100.0%	29.91	25.36% to 34.90%	1.427
< 9.795	100	92.73% to 100.0%	29.34	24.83% to 34.31%	1.415
< 9.805	100	92.73% to 100.0%	28.77	24.29% to 33.72%	1.404
< 9.815	100	92.73% to 100.0%	27.92	23.49% to 32.83%	1.387
< 9.825	100	92.73% to 100.0%	27.64	23.22% to 32.54%	1.382
< 9.835	100	92.73% to 100.0%	26.21	21.89% to 31.05%	1.355
< 9.845	100	92.73% to 100.0%	25.07	20.82% to 29.86%	1.335
< 9.855	100	92.73% to 100.0%	23.93	19.77% to 28.66%	1.315
< 9.865	100	92.73% to 100.0%	23.36	19.24% to 28.06%	1.305
< 9.875	100	92.73% to 100.0%	23.08	18.97% to 27.76%	1.3
< 9.885	100	92.73% to 100.0%	22.79	18.71% to 27.46%	1.295
< 9.895	100	92.73% to 100.0%	22.51	18.45% to 27.16%	1.29
< 9.905	100	92.73% to 100.0%	21.94	17.92% to 26.56%	1.281
< 9.915	100	92.73% to 100.0%	21.65	17.66% to 26.26%	1.276
< 9.925	100	92.73% to 100.0%	21.37	17.40% to 25.95%	1.272
< 9.935	100	92.73% to 100.0%	20.8	16.88% to 25.35%	1.263
< 9.945	100	92.73% to 100.0%	20.23	16.36% to 24.74%	1.254
< 9.955	100	92.73% to 100.0%	19.09	15.32% to 23.53%	1.236
< 9.965	100	92.73% to 100.0%	18.52	14.80% to 22.92%	1.227
< 9.980	100	92.73% to 100.0%	17.38	13.77% to 21.69%	1.21
< 9.995	100	92.73% to 100.0%	17.09	13.52% to 21.38%	1.206
< 10.01	100	92.73% to 100.0%	16.24	12.75% to 20.46%	1.194
< 10.02	100	92.73% to 100.0%	15.38	11.99% to 19.53%	1.182
< 10.03	100	92.73% to 100.0%	15.1	11.73% to 19.22%	1.178
< 10.06	100	92.73% to 100.0%	14.81	11.48% to 18.91%	1.174
< 10.10	100	92.73% to 100.0%	14.53	11.23% to 18.60%	1.17
< 10.11	100	92.73% to 100.0%	13.68	10.47% to 17.66%	1.158
< 10.13	100	92.73% to 100.0%	13.11	9.971% to 17.04%	1.151
< 10.14	100	92.73% to 100.0%	11.97	8.976% to 15.78%	1.136
< 10.16	100	92.73% to 100.0%	11.4	8.481% to 15.15%	1.129
< 10.18	100	92.73% to 100.0%	11.11	8.235% to 14.83%	1.125
< 10.20	100	92.73% to 100.0%	10.26	7.501% to 13.87%	1.114
< 10.22	100	92.73% to 100.0%	9.687	7.015% to 13.23%	1.107
< 10.25	100	92.73% to 100.0%	9.402	6.773% to 12.91%	1.104
< 10.29	100	92.73% to 100.0%	8.547	6.052% to 11.94%	1.093
< 10.33	100	92.73% to 100.0%	8.262	5.814% to 11.61%	1.09
< 10.36	100	92.73% to 100.0%	7.407	5.105% to 10.63%	1.08
< 10.37	100	92.73% to 100.0%	7.123	4.871% to 10.30%	1.077
< 10.38	100	92.73% to 100.0%	6.838	4.638% to 9.972%	1.073
< 10.40	100	92.73% to 100.0%	6.553	4.406% to 9.640%	1.07
< 10.41	100	92.73% to 100.0%	6.268	4.175% to 9.307%	1.067
< 10.42	100	92.73% to 100.0%	5.983	3.946% to 8.973%	1.064
< 10.43	100	92.73% to 100.0%	5.413	3.492% to 8.299%	1.057
< 10.45	100	92.73% to 100.0%	5.128	3.268% to 7.960%	1.054
< 10.49	100	92.73% to 100.0%	4.843	3.046% to 7.619%	1.051
< 10.52	100	92.73% to 100.0%	4.558	2.825% to 7.276%	1.048
< 10.54	100	92.73% to 100.0%	4.274	2.607% to 6.930%	1.045
< 10.55	100	92.73% to 100.0%	3.989	2.391% to 6.583%	1.042
< 10.57	100	92.73% to 100.0%	3.704	2.177% to 6.233%	1.038
< 10.58	100	92.73% to 100.0%	3.419	1.966% to 5.880%	1.035
< 10.61	100	92.73% to 100.0%	2.564	1.355% to 4.801%	1.026
< 10.67	100	92.73% to 100.0%	2.279	1.159% to 4.432%	1.023
< 10.80	100	92.73% to 100.0%	1.709	0.7857% to 3.679%	1.017
< 10.94	100	92.73% to 100.0%	1.425	0.6100% to 3.291%	1.014
< 11.01	100	92.73% to 100.0%	1.14	0.4440% to 2.893%	1.012
< 11.04	100	92.73% to 100.0%	0.8547	0.2330% to 2.482%	1.009
< 11.13	100	92.73% to 100.0%	0.5698	0.1012% to 2.053%	1.006
< 11.33	100	92.73% to 100.0%	0.2849	0.01461% to 1.596%	1.003

## Sheet: CPSF4
	Sensitivity%	95% CI	Specificity%	95% CI	Likelihood ratio
< 7.565	2.041	0.1047% to 10.69%	100	98.92% to 100.0%
< 7.710	6.122	2.104% to 16.52%	100	98.92% to 100.0%
< 7.845	6.122	2.104% to 16.52%	99.72	98.40% to 99.99%	21.49
< 7.965	8.163	3.220% to 19.19%	99.43	97.95% to 99.90%	14.33
< 8.005	10.2	4.438% to 21.76%	99.43	97.95% to 99.90%	17.91
< 8.025	10.2	4.438% to 21.76%	99.15	97.52% to 99.77%	11.94
< 8.040	12.24	5.735% to 24.24%	99.15	97.52% to 99.77%	14.33
< 8.060	14.29	7.096% to 26.67%	98.86	97.11% to 99.56%	12.54
< 8.075	16.33	8.513% to 29.04%	98.58	96.71% to 99.39%	11.46
< 8.105	18.37	9.976% to 31.36%	98.29	96.32% to 99.21%	10.74
< 8.140	20.41	11.48% to 33.64%	98.29	96.32% to 99.21%	11.94
< 8.155	20.41	11.48% to 33.64%	98.01	95.94% to 99.03%	10.23
< 8.175	20.41	11.48% to 33.64%	97.72	95.57% to 98.84%	8.954
< 8.200	20.41	11.48% to 33.64%	97.44	95.20% to 98.65%	7.959
< 8.220	22.45	13.02% to 35.88%	97.15	94.84% to 98.45%	7.88
< 8.235	22.45	13.02% to 35.88%	96.87	94.48% to 98.24%	7.163
< 8.245	24.49	14.60% to 38.09%	96.87	94.48% to 98.24%	7.814
< 8.255	28.57	17.85% to 42.41%	96.87	94.48% to 98.24%	9.117
< 8.265	30.61	19.52% to 44.53%	96.01	93.42% to 97.61%	7.675
< 8.275	30.61	19.52% to 44.53%	95.44	92.72% to 97.17%	6.716
< 8.285	30.61	19.52% to 44.53%	95.16	92.38% to 96.95%	6.321
< 8.295	32.65	21.21% to 46.62%	94.87	92.04% to 96.73%	6.367
< 8.305	34.69	22.92% to 48.69%	94.87	92.04% to 96.73%	6.765
< 8.315	34.69	22.92% to 48.69%	94.3	91.36% to 96.28%	6.089
< 8.325	36.73	24.67% to 50.73%	94.3	91.36% to 96.28%	6.447
< 8.335	38.78	26.43% to 52.75%	94.3	91.36% to 96.28%	6.805
< 8.350	40.82	28.22% to 54.75%	94.3	91.36% to 96.28%	7.163
< 8.370	44.9	31.85% to 58.68%	94.3	91.36% to 96.28%	7.88
< 8.385	46.94	33.70% to 60.62%	94.02	91.03% to 96.05%	7.845
< 8.395	48.98	35.58% to 62.53%	94.02	91.03% to 96.05%	8.187
< 8.405	51.02	37.47% to 64.42%	93.73	90.69% to 95.82%	8.14
< 8.415	53.06	39.38% to 66.30%	93.16	90.03% to 95.36%	7.76
< 8.425	53.06	39.38% to 66.30%	92.59	89.37% to 94.90%	7.163
< 8.435	55.1	41.32% to 68.15%	92.31	89.04% to 94.66%	7.163
< 8.445	59.18	45.25% to 71.78%	92.31	89.04% to 94.66%	7.694
< 8.455	59.18	45.25% to 71.78%	91.74	88.39% to 94.19%	7.163
< 8.470	61.22	47.25% to 73.57%	91.74	88.39% to 94.19%	7.41
< 8.485	63.27	49.27% to 75.33%	91.74	88.39% to 94.19%	7.657
< 8.495	63.27	49.27% to 75.33%	91.45	88.06% to 93.95%	7.402
< 8.505	63.27	49.27% to 75.33%	91.17	87.74% to 93.71%	7.163
< 8.515	63.27	49.27% to 75.33%	90.88	87.41% to 93.47%	6.939
< 8.525	63.27	49.27% to 75.33%	90.6	87.09% to 93.23%	6.729
< 8.535	65.31	51.31% to 77.08%	90.31	86.77% to 92.99%	6.742
< 8.550	65.31	51.31% to 77.08%	89.46	85.81% to 92.26%	6.195
< 8.565	69.39	55.47% to 80.48%	89.17	85.49% to 92.01%	6.409
< 8.575	69.39	55.47% to 80.48%	88.89	85.17% to 91.76%	6.245
< 8.585	69.39	55.47% to 80.48%	88.32	84.54% to 91.27%	5.94
< 8.595	73.47	59.74% to 83.79%	88.03	84.22% to 91.02%	6.14
< 8.610	73.47	59.74% to 83.79%	87.75	83.90% to 90.78%	5.997
< 8.625	75.51	61.91% to 85.40%	86.61	82.65% to 89.78%	5.639
< 8.635	77.55	64.12% to 86.98%	86.04	82.02% to 89.28%	5.555
< 8.645	77.55	64.12% to 86.98%	85.19	81.09% to 88.52%	5.235
< 8.655	79.59	66.36% to 88.52%	85.19	81.09% to 88.52%	5.372
< 8.665	79.59	66.36% to 88.52%	83.48	79.23% to 86.99%	4.817
< 8.675	81.63	68.64% to 90.02%	82.62	78.31% to 86.23%	4.697
< 8.685	81.63	68.64% to 90.02%	82.34	78.00% to 85.97%	4.621
< 8.695	83.67	70.96% to 91.49%	81.2	76.78% to 84.94%	4.45
< 8.705	83.67	70.96% to 91.49%	80.34	75.87% to 84.16%	4.256
< 8.715	83.67	70.96% to 91.49%	80.06	75.56% to 83.90%	4.196
< 8.725	83.67	70.96% to 91.49%	79.77	75.26% to 83.64%	4.137
< 8.735	85.71	73.33% to 92.90%	79.49	74.95% to 83.38%	4.179
< 8.745	85.71	73.33% to 92.90%	77.78	73.14% to 81.81%	3.857
< 8.755	85.71	73.33% to 92.90%	77.49	72.84% to 81.55%	3.808
< 8.765	87.76	75.76% to 94.27%	76.92	72.24% to 81.03%	3.803
< 8.780	87.76	75.76% to 94.27%	76.35	71.64% to 80.50%	3.711
< 8.795	87.76	75.76% to 94.27%	76.07	71.34% to 80.23%	3.667
< 8.805	87.76	75.76% to 94.27%	75.21	70.44% to 79.44%	3.54
< 8.815	87.76	75.76% to 94.27%	74.93	70.14% to 79.18%	3.5
< 8.825	87.76	75.76% to 94.27%	74.36	69.54% to 78.65%	3.422
< 8.840	89.8	78.24% to 95.56%	74.36	69.54% to 78.65%	3.502
< 8.855	89.8	78.24% to 95.56%	74.07	69.25% to 78.38%	3.464
< 8.870	89.8	78.24% to 95.56%	72.93	68.06% to 77.32%	3.318
< 8.885	89.8	78.24% to 95.56%	71.79	66.87% to 76.25%	3.184
< 8.895	91.84	80.81% to 96.78%	71.23	66.28% to 75.71%	3.192
< 8.905	91.84	80.81% to 96.78%	70.94	65.98% to 75.44%	3.16
< 8.915	91.84	80.81% to 96.78%	70.37	65.39% to 74.91%	3.099
< 8.930	91.84	80.81% to 96.78%	69.52	64.51% to 74.10%	3.013
< 8.945	91.84	80.81% to 96.78%	68.66	63.63% to 73.29%	2.93
< 8.955	91.84	80.81% to 96.78%	66.95	61.87% to 71.67%	2.779
< 8.965	91.84	80.81% to 96.78%	66.1	60.99% to 70.85%	2.709
< 8.975	91.84	80.81% to 96.78%	64.96	59.83% to 69.76%	2.621
< 8.985	93.88	83.48% to 97.90%	64.39	59.25% to 69.22%	2.636
< 8.995	93.88	83.48% to 97.90%	63.82	58.67% to 68.67%	2.595
< 9.005	93.88	83.48% to 97.90%	63.25	58.09% to 68.12%	2.554
< 9.015	93.88	83.48% to 97.90%	62.96	57.80% to 67.85%	2.535
< 9.025	93.88	83.48% to 97.90%	62.39	57.22% to 67.30%	2.496
< 9.035	93.88	83.48% to 97.90%	61.25	56.06% to 66.20%	2.423
< 9.045	93.88	83.48% to 97.90%	60.4	55.20% to 65.38%	2.371
< 9.055	93.88	83.48% to 97.90%	58.97	53.76% to 64.00%	2.288
< 9.065	93.88	83.48% to 97.90%	58.69	53.47% to 63.72%	2.272
< 9.075	95.92	86.29% to 99.27%	57.26	52.04% to 62.33%	2.244
< 9.085	97.96	89.31% to 99.90%	56.41	51.18% to 61.50%	2.247
< 9.095	97.96	89.31% to 99.90%	55.56	50.32% to 60.67%	2.204
< 9.105	97.96	89.31% to 99.90%	55.27	50.04% to 60.39%	2.19
< 9.115	97.96	89.31% to 99.90%	54.7	49.47% to 59.83%	2.162
< 9.125	97.96	89.31% to 99.90%	53.56	48.33% to 58.71%	2.109
< 9.135	97.96	89.31% to 99.90%	52.71	47.48% to 57.87%	2.071
< 9.145	97.96	89.31% to 99.90%	52.14	46.92% to 57.31%	2.047
< 9.155	100	92.73% to 100.0%	50.71	45.50% to 55.91%	2.029
< 9.165	100	92.73% to 100.0%	49.86	44.66% to 55.06%	1.994
< 9.175	100	92.73% to 100.0%	48.72	43.53% to 53.93%	1.95
< 9.190	100	92.73% to 100.0%	47.86	42.69% to 53.08%	1.918
< 9.205	100	92.73% to 100.0%	47.29	42.13% to 52.52%	1.897
< 9.215	100	92.73% to 100.0%	47.01	41.85% to 52.23%	1.887
< 9.225	100	92.73% to 100.0%	46.15	41.01% to 51.38%	1.857
< 9.235	100	92.73% to 100.0%	45.3	40.17% to 50.53%	1.828
< 9.245	100	92.73% to 100.0%	44.44	39.33% to 49.68%	1.8
< 9.255	100	92.73% to 100.0%	43.87	38.78% to 49.10%	1.782
< 9.265	100	92.73% to 100.0%	43.3	38.22% to 48.53%	1.764
< 9.275	100	92.73% to 100.0%	42.74	37.67% to 47.96%	1.746
< 9.285	100	92.73% to 100.0%	42.17	37.11% to 47.39%	1.729
< 9.300	100	92.73% to 100.0%	41.6	36.56% to 46.82%	1.712
< 9.315	100	92.73% to 100.0%	41.03	36.00% to 46.24%	1.696
< 9.325	100	92.73% to 100.0%	40.74	35.73% to 45.95%	1.688
< 9.335	100	92.73% to 100.0%	40.17	35.18% to 45.38%	1.671
< 9.345	100	92.73% to 100.0%	38.75	33.80% to 43.94%	1.633
< 9.355	100	92.73% to 100.0%	37.61	32.70% to 42.78%	1.603
< 9.365	100	92.73% to 100.0%	37.32	32.42% to 42.49%	1.595
< 9.375	100	92.73% to 100.0%	36.18	31.33% to 41.33%	1.567
< 9.385	100	92.73% to 100.0%	35.9	31.06% to 41.04%	1.56
< 9.395	100	92.73% to 100.0%	34.76	29.97% to 39.88%	1.533
< 9.405	100	92.73% to 100.0%	33.9	29.15% to 39.01%	1.513
< 9.415	100	92.73% to 100.0%	33.05	28.33% to 38.13%	1.494
< 9.425	100	92.73% to 100.0%	32.48	27.79% to 37.54%	1.481
< 9.440	100	92.73% to 100.0%	32.19	27.52% to 37.25%	1.475
< 9.455	100	92.73% to 100.0%	31.62	26.98% to 36.67%	1.463
< 9.465	100	92.73% to 100.0%	31.34	26.71% to 36.37%	1.456
< 9.475	100	92.73% to 100.0%	30.2	25.63% to 35.20%	1.433
< 9.485	100	92.73% to 100.0%	29.91	25.36% to 34.90%	1.427
< 9.505	100	92.73% to 100.0%	29.06	24.56% to 34.02%	1.41
< 9.525	100	92.73% to 100.0%	28.77	24.29% to 33.72%	1.404
< 9.535	100	92.73% to 100.0%	28.21	23.75% to 33.13%	1.393
< 9.545	100	92.73% to 100.0%	27.35	22.95% to 32.24%	1.376
< 9.555	100	92.73% to 100.0%	25.93	21.62% to 30.75%	1.35
< 9.565	100	92.73% to 100.0%	25.07	20.82% to 29.86%	1.335
< 9.575	100	92.73% to 100.0%	24.5	20.29% to 29.26%	1.325
< 9.585	100	92.73% to 100.0%	23.93	19.77% to 28.66%	1.315
< 9.595	100	92.73% to 100.0%	23.65	19.50% to 28.36%	1.31
< 9.605	100	92.73% to 100.0%	23.36	19.24% to 28.06%	1.305
< 9.615	100	92.73% to 100.0%	22.79	18.71% to 27.46%	1.295
< 9.625	100	92.73% to 100.0%	22.22	18.19% to 26.86%	1.286
< 9.635	100	92.73% to 100.0%	21.94	17.92% to 26.56%	1.281
< 9.645	100	92.73% to 100.0%	21.65	17.66% to 26.26%	1.276
< 9.655	100	92.73% to 100.0%	21.37	17.40% to 25.95%	1.272
< 9.665	100	92.73% to 100.0%	19.37	15.58% to 23.83%	1.24
< 9.675	100	92.73% to 100.0%	19.09	15.32% to 23.53%	1.236
< 9.685	100	92.73% to 100.0%	18.8	15.06% to 23.22%	1.232
< 9.695	100	92.73% to 100.0%	18.23	14.55% to 22.61%	1.223
< 9.705	100	92.73% to 100.0%	17.95	14.29% to 22.30%	1.219
< 9.715	100	92.73% to 100.0%	17.66	14.03% to 22.00%	1.215
< 9.730	100	92.73% to 100.0%	16.24	12.75% to 20.46%	1.194
< 9.745	100	92.73% to 100.0%	15.38	11.99% to 19.53%	1.182
< 9.755	100	92.73% to 100.0%	15.1	11.73% to 19.22%	1.178
< 9.765	100	92.73% to 100.0%	14.53	11.23% to 18.60%	1.17
< 9.780	100	92.73% to 100.0%	14.25	10.97% to 18.29%	1.166
< 9.830	100	92.73% to 100.0%	13.11	9.971% to 17.04%	1.151
< 9.875	100	92.73% to 100.0%	12.82	9.721% to 16.72%	1.147
< 9.885	100	92.73% to 100.0%	12.25	9.224% to 16.10%	1.14
< 9.895	100	92.73% to 100.0%	11.68	8.728% to 15.46%	1.132
< 9.905	100	92.73% to 100.0%	11.11	8.235% to 14.83%	1.125
< 9.915	100	92.73% to 100.0%	10.83	7.990% to 14.51%	1.121
< 9.930	100	92.73% to 100.0%	10.26	7.501% to 13.87%	1.114
< 9.950	100	92.73% to 100.0%	9.972	7.257% to 13.55%	1.111
< 9.970	100	92.73% to 100.0%	9.687	7.015% to 13.23%	1.107
< 9.985	100	92.73% to 100.0%	9.117	6.532% to 12.59%	1.1
< 10.01	100	92.73% to 100.0%	8.547	6.052% to 11.94%	1.093
< 10.03	100	92.73% to 100.0%	8.262	5.814% to 11.61%	1.09
< 10.04	100	92.73% to 100.0%	7.977	5.577% to 11.29%	1.087
< 10.07	100	92.73% to 100.0%	7.692	5.340% to 10.96%	1.083
< 10.09	100	92.73% to 100.0%	7.407	5.105% to 10.63%	1.08
< 10.11	100	92.73% to 100.0%	7.123	4.871% to 10.30%	1.077
< 10.13	100	92.73% to 100.0%	6.838	4.638% to 9.972%	1.073
< 10.15	100	92.73% to 100.0%	6.553	4.406% to 9.640%	1.07
< 10.16	100	92.73% to 100.0%	6.268	4.175% to 9.307%	1.067
< 10.17	100	92.73% to 100.0%	5.983	3.946% to 8.973%	1.064
< 10.20	100	92.73% to 100.0%	5.698	3.719% to 8.637%	1.06
< 10.23	100	92.73% to 100.0%	5.413	3.492% to 8.299%	1.057
< 10.25	100	92.73% to 100.0%	5.128	3.268% to 7.960%	1.054
< 10.27	100	92.73% to 100.0%	4.843	3.046% to 7.619%	1.051
< 10.28	100	92.73% to 100.0%	4.558	2.825% to 7.276%	1.048
< 10.30	100	92.73% to 100.0%	4.274	2.607% to 6.930%	1.045
< 10.32	100	92.73% to 100.0%	3.989	2.391% to 6.583%	1.042
< 10.35	100	92.73% to 100.0%	3.704	2.177% to 6.233%	1.038
< 10.38	100	92.73% to 100.0%	3.419	1.966% to 5.880%	1.035
< 10.41	100	92.73% to 100.0%	3.134	1.759% to 5.524%	1.032
< 10.47	100	92.73% to 100.0%	2.849	1.555% to 5.164%	1.029
< 10.56	100	92.73% to 100.0%	2.564	1.355% to 4.801%	1.026
< 10.60	100	92.73% to 100.0%	2.279	1.159% to 4.432%	1.023
< 10.64	100	92.73% to 100.0%	1.709	0.7857% to 3.679%	1.017
< 10.72	100	92.73% to 100.0%	1.425	0.6100% to 3.291%	1.014
< 10.82	100	92.73% to 100.0%	1.14	0.4440% to 2.893%	1.012
< 10.89	100	92.73% to 100.0%	0.8547	0.2330% to 2.482%	1.009
< 11.25	100	92.73% to 100.0%	0.5698	0.1012% to 2.053%	1.006
< 12.07	100	92.73% to 100.0%	0.2849	0.01461% to 1.596%	1.003

## Sheet: NUDT21
	Sensitivity%	95% CI	Specificity%	95% CI	Likelihood ratio
< 8.599	0	0.000% to 1.671%	99.76	98.68% to 99.99%	0
< 8.776	0	0.000% to 1.671%	99.53	98.30% to 99.92%	0
< 8.807	0	0.000% to 1.671%	99.29	97.94% to 99.81%	0
< 8.879	0	0.000% to 1.671%	99.06	97.60% to 99.63%	0
< 8.932	0	0.000% to 1.671%	98.82	97.27% to 99.50%	0
< 8.943	0	0.000% to 1.671%	98.58	96.95% to 99.35%	0
< 8.956	0	0.000% to 1.671%	98.35	96.63% to 99.20%	0
< 8.972	0	0.000% to 1.671%	98.11	96.32% to 99.04%	0
< 8.996	0	0.000% to 1.671%	97.88	96.02% to 98.88%	0
< 9.040	0	0.000% to 1.671%	97.64	95.71% to 98.71%	0
< 9.087	0	0.000% to 1.671%	97.41	95.41% to 98.55%	0
< 9.129	0	0.000% to 1.671%	97.17	95.12% to 98.37%	0
< 9.156	0.4425	0.02270% to 2.463%	97.17	95.12% to 98.37%	0.1563
< 9.183	0.4425	0.02270% to 2.463%	96.93	94.83% to 98.20%	0.1443
< 9.225	0.4425	0.02270% to 2.463%	96.7	94.53% to 98.02%	0.134
< 9.261	0.4425	0.02270% to 2.463%	96.46	94.25% to 97.84%	0.1251
< 9.287	0.4425	0.02270% to 2.463%	96.23	93.96% to 97.66%	0.1173
< 9.303	0.885	0.1572% to 3.169%	95.99	93.67% to 97.48%	0.2207
< 9.323	0.885	0.1572% to 3.169%	95.75	93.39% to 97.30%	0.2085
< 9.341	0.885	0.1572% to 3.169%	95.52	93.11% to 97.11%	0.1975
< 9.359	0.885	0.1572% to 3.169%	95.28	92.83% to 96.93%	0.1876
< 9.374	1.327	0.3618% to 3.829%	95.28	92.83% to 96.93%	0.2814
< 9.401	1.327	0.3618% to 3.829%	94.81	92.27% to 96.55%	0.2558
< 9.440	1.327	0.3618% to 3.829%	94.58	91.99% to 96.36%	0.2447
< 9.461	1.327	0.3618% to 3.829%	94.1	91.44% to 95.97%	0.2251
< 9.472	1.327	0.3618% to 3.829%	93.87	91.17% to 95.78%	0.2165
< 9.494	1.327	0.3618% to 3.829%	93.63	90.89% to 95.59%	0.2085
< 9.519	1.327	0.3618% to 3.829%	93.4	90.62% to 95.39%	0.201
< 9.526	1.327	0.3618% to 3.829%	93.16	90.35% to 95.20%	0.1941
< 9.528	1.77	0.6904% to 4.462%	93.16	90.35% to 95.20%	0.2588
< 9.533	1.77	0.6904% to 4.462%	92.69	89.81% to 94.80%	0.2421
< 9.541	1.77	0.6904% to 4.462%	92.45	89.54% to 94.60%	0.2345
< 9.550	1.77	0.6904% to 4.462%	92.22	89.27% to 94.40%	0.2274
< 9.561	1.77	0.6904% to 4.462%	91.98	89.00% to 94.21%	0.2207
< 9.573	1.77	0.6904% to 4.462%	91.75	88.74% to 94.00%	0.2144
< 9.578	1.77	0.6904% to 4.462%	91.51	88.47% to 93.80%	0.2085
< 9.581	1.77	0.6904% to 4.462%	91.04	87.94% to 93.40%	0.1975
< 9.607	1.77	0.6904% to 4.462%	90.8	87.67% to 93.20%	0.1924
< 9.642	1.77	0.6904% to 4.462%	90.57	87.41% to 93.00%	0.1876
< 9.665	1.77	0.6904% to 4.462%	90.33	87.14% to 92.79%	0.183
< 9.679	1.77	0.6904% to 4.462%	90.09	86.88% to 92.59%	0.1787
< 9.689	2.212	0.9486% to 5.074%	90.09	86.88% to 92.59%	0.2233
< 9.698	2.212	0.9486% to 5.074%	89.86	86.62% to 92.38%	0.2182
< 9.706	2.212	0.9486% to 5.074%	89.62	86.36% to 92.18%	0.2132
< 9.714	2.655	1.222% to 5.670%	89.62	86.36% to 92.18%	0.2558
< 9.717	2.655	1.222% to 5.670%	89.39	86.09% to 91.97%	0.2501
< 9.720	2.655	1.222% to 5.670%	89.15	85.83% to 91.77%	0.2447
< 9.725	3.097	1.508% to 6.254%	89.15	85.83% to 91.77%	0.2855
< 9.727	3.54	1.804% to 6.828%	88.92	85.57% to 91.56%	0.3193
< 9.730	3.54	1.804% to 6.828%	88.68	85.31% to 91.35%	0.3127
< 9.734	3.982	2.109% to 7.394%	88.68	85.31% to 91.35%	0.3518
< 9.738	3.982	2.109% to 7.394%	88.44	85.05% to 91.15%	0.3446
< 9.744	3.982	2.109% to 7.394%	88.21	84.79% to 90.94%	0.3377
< 9.750	3.982	2.109% to 7.394%	87.74	84.27% to 90.52%	0.3247
< 9.758	3.982	2.109% to 7.394%	87.5	84.01% to 90.32%	0.3186
< 9.765	4.425	2.421% to 7.952%	87.5	84.01% to 90.32%	0.354
< 9.771	4.867	2.739% to 8.504%	87.5	84.01% to 90.32%	0.3894
< 9.780	4.867	2.739% to 8.504%	87.26	83.75% to 90.11%	0.3822
< 9.786	5.31	3.063% to 9.050%	87.26	83.75% to 90.11%	0.4169
< 9.790	5.31	3.063% to 9.050%	87.03	83.49% to 89.90%	0.4093
< 9.795	5.752	3.392% to 9.591%	86.79	83.24% to 89.69%	0.4355
< 9.803	6.195	3.726% to 10.13%	86.79	83.24% to 89.69%	0.469
< 9.815	6.195	3.726% to 10.13%	86.56	82.98% to 89.48%	0.4608
< 9.829	6.637	4.063% to 10.66%	86.56	82.98% to 89.48%	0.4937
< 9.838	7.08	4.404% to 11.19%	86.32	82.72% to 89.27%	0.5175
< 9.845	7.522	4.749% to 11.71%	86.32	82.72% to 89.27%	0.5499
< 9.849	7.965	5.097% to 12.24%	86.32	82.72% to 89.27%	0.5822
< 9.859	8.407	5.448% to 12.76%	86.32	82.72% to 89.27%	0.6146
< 9.875	8.85	5.802% to 13.27%	86.32	82.72% to 89.27%	0.6469
< 9.884	8.85	5.802% to 13.27%	86.08	82.47% to 89.06%	0.636
< 9.895	9.292	6.158% to 13.79%	86.08	82.47% to 89.06%	0.6678
< 9.906	9.292	6.158% to 13.79%	85.85	82.21% to 88.85%	0.6566
< 9.909	9.292	6.158% to 13.79%	85.61	81.95% to 88.63%	0.6459
< 9.911	9.292	6.158% to 13.79%	85.38	81.70% to 88.42%	0.6355
< 9.913	9.292	6.158% to 13.79%	85.14	81.44% to 88.21%	0.6254
< 9.917	9.292	6.158% to 13.79%	84.91	81.19% to 88.00%	0.6156
< 9.920	9.292	6.158% to 13.79%	84.67	80.93% to 87.79%	0.6061
< 9.921	9.292	6.158% to 13.79%	84.43	80.68% to 87.57%	0.5969
< 9.931	9.735	6.517% to 14.30%	84.43	80.68% to 87.57%	0.6254
< 9.944	9.735	6.517% to 14.30%	84.2	80.42% to 87.36%	0.616
< 9.952	10.18	6.878% to 14.81%	84.2	80.42% to 87.36%	0.644
< 9.960	10.62	7.241% to 15.31%	83.96	80.17% to 87.15%	0.6622
< 9.965	11.06	7.606% to 15.82%	83.96	80.17% to 87.15%	0.6897
< 9.970	11.06	7.606% to 15.82%	83.73	79.91% to 86.93%	0.6797
< 9.976	11.06	7.606% to 15.82%	83.49	79.66% to 86.72%	0.67
< 9.981	11.5	7.973% to 16.32%	83.49	79.66% to 86.72%	0.6968
< 9.984	11.5	7.973% to 16.32%	83.25	79.41% to 86.51%	0.687
< 9.987	11.95	8.342% to 16.82%	83.25	79.41% to 86.51%	0.7134
< 9.988	11.95	8.342% to 16.82%	83.02	79.15% to 86.29%	0.7035
< 9.992	11.95	8.342% to 16.82%	82.78	78.90% to 86.08%	0.6939
< 9.998	11.95	8.342% to 16.82%	82.55	78.65% to 85.86%	0.6845
< 10.00	12.39	8.713% to 17.32%	82.55	78.65% to 85.86%	0.7099
< 10.01	12.39	8.713% to 17.32%	82.31	78.39% to 85.65%	0.7004
< 10.02	12.83	9.085% to 17.82%	82.08	78.14% to 85.43%	0.7159
< 10.02	13.27	9.459% to 18.32%	82.08	78.14% to 85.43%	0.7406
< 10.03	13.27	9.459% to 18.32%	81.84	77.89% to 85.22%	0.731
< 10.03	13.27	9.459% to 18.32%	81.6	77.64% to 85.00%	0.7216
< 10.04	13.27	9.459% to 18.32%	81.37	77.39% to 84.79%	0.7124
< 10.04	13.27	9.459% to 18.32%	81.13	77.13% to 84.57%	0.7035
< 10.04	13.27	9.459% to 18.32%	80.9	76.88% to 84.35%	0.6949
< 10.05	13.72	9.835% to 18.81%	80.9	76.88% to 84.35%	0.718
< 10.05	13.72	9.835% to 18.81%	80.66	76.63% to 84.14%	0.7093
< 10.05	14.16	10.21% to 19.31%	80.42	76.38% to 83.92%	0.7233
< 10.06	14.6	10.59% to 19.80%	80.19	76.13% to 83.70%	0.737
< 10.06	15.04	10.97% to 20.29%	79.95	75.88% to 83.49%	0.7504
< 10.06	15.49	11.35% to 20.78%	79.95	75.88% to 83.49%	0.7725
< 10.06	15.49	11.35% to 20.78%	79.72	75.63% to 83.27%	0.7635
< 10.07	15.49	11.35% to 20.78%	79.48	75.38% to 83.05%	0.7548
< 10.07	15.49	11.35% to 20.78%	79.25	75.13% to 82.83%	0.7462
< 10.08	15.49	11.35% to 20.78%	79.01	74.88% to 82.62%	0.7378
< 10.08	15.49	11.35% to 20.78%	78.77	74.63% to 82.40%	0.7296
< 10.09	15.49	11.35% to 20.78%	78.54	74.38% to 82.18%	0.7216
< 10.10	15.49	11.35% to 20.78%	78.3	74.13% to 81.96%	0.7137
< 10.10	15.49	11.35% to 20.78%	78.07	73.88% to 81.74%	0.7061
< 10.10	16.37	12.12% to 21.75%	78.07	73.88% to 81.74%	0.7464
< 10.11	17.26	12.89% to 22.72%	77.83	73.64% to 81.52%	0.7784
< 10.12	17.7	13.28% to 23.20%	77.83	73.64% to 81.52%	0.7983
< 10.12	18.14	13.66% to 23.68%	77.83	73.64% to 81.52%	0.8183
< 10.12	18.58	14.05% to 24.17%	77.83	73.64% to 81.52%	0.8383
< 10.12	18.58	14.05% to 24.17%	77.59	73.39% to 81.31%	0.8294
< 10.13	18.58	14.05% to 24.17%	77.36	73.14% to 81.09%	0.8208
< 10.13	19.03	14.44% to 24.64%	77.36	73.14% to 81.09%	0.8403
< 10.13	19.47	14.83% to 25.12%	77.36	73.14% to 81.09%	0.8599
< 10.14	20.35	15.62% to 26.08%	77.36	73.14% to 81.09%	0.899
< 10.14	20.8	16.02% to 26.55%	77.36	73.14% to 81.09%	0.9185
< 10.14	21.24	16.41% to 27.03%	77.36	73.14% to 81.09%	0.9381
< 10.15	21.24	16.41% to 27.03%	77.12	72.89% to 80.87%	0.9284
< 10.15	21.24	16.41% to 27.03%	76.65	72.40% to 80.43%	0.9096
< 10.15	21.24	16.41% to 27.03%	76.18	71.90% to 79.99%	0.8916
< 10.15	21.68	16.81% to 27.50%	76.18	71.90% to 79.99%	0.9102
< 10.16	21.68	16.81% to 27.50%	75.94	71.65% to 79.77%	0.9013
< 10.16	22.12	17.20% to 27.98%	75.71	71.41% to 79.55%	0.9107
< 10.17	22.12	17.20% to 27.98%	75.47	71.16% to 79.33%	0.902
< 10.17	22.57	17.60% to 28.45%	75.47	71.16% to 79.33%	0.92
< 10.18	23.01	18.00% to 28.92%	75.47	71.16% to 79.33%	0.9381
< 10.19	23.45	18.40% to 29.39%	75.47	71.16% to 79.33%	0.9561
< 10.19	23.89	18.80% to 29.86%	75.47	71.16% to 79.33%	0.9741
< 10.20	23.89	18.80% to 29.86%	75.24	70.91% to 79.11%	0.9649
< 10.20	23.89	18.80% to 29.86%	75	70.67% to 78.88%	0.9558
< 10.21	23.89	18.80% to 29.86%	74.76	70.42% to 78.66%	0.9468
< 10.22	23.89	18.80% to 29.86%	74.53	70.17% to 78.44%	0.9381
< 10.22	23.89	18.80% to 29.86%	74.29	69.93% to 78.22%	0.9294
< 10.23	23.89	18.80% to 29.86%	74.06	69.68% to 78.00%	0.921
< 10.23	23.89	18.80% to 29.86%	73.82	69.44% to 77.78%	0.9127
< 10.23	24.34	19.20% to 30.33%	73.82	69.44% to 77.78%	0.9296
< 10.23	24.34	19.20% to 30.33%	73.58	69.19% to 77.56%	0.9213
< 10.23	24.78	19.60% to 30.80%	73.58	69.19% to 77.56%	0.9381
< 10.23	25.22	20.01% to 31.27%	73.58	69.19% to 77.56%	0.9548
< 10.24	26.11	20.81% to 32.20%	73.58	69.19% to 77.56%	0.9883
< 10.24	26.11	20.81% to 32.20%	73.35	68.94% to 77.33%	0.9796
< 10.24	26.55	21.22% to 32.66%	73.11	68.70% to 77.11%	0.9874
< 10.24	26.99	21.62% to 33.13%	73.11	68.70% to 77.11%	1.004
< 10.24	26.99	21.62% to 33.13%	72.88	68.45% to 76.89%	0.9952
< 10.25	26.99	21.62% to 33.13%	72.64	68.21% to 76.67%	0.9866
< 10.25	27.43	22.03% to 33.59%	72.64	68.21% to 76.67%	1.003
< 10.26	27.43	22.03% to 33.59%	72.41	67.96% to 76.44%	0.9942
< 10.26	27.88	22.44% to 34.05%	72.17	67.72% to 76.22%	1.002
< 10.26	28.32	22.85% to 34.52%	71.93	67.47% to 76.00%	1.009
< 10.26	28.32	22.85% to 34.52%	71.7	67.23% to 75.78%	1.001
< 10.26	28.76	23.25% to 34.98%	71.7	67.23% to 75.78%	1.016
< 10.27	29.2	23.66% to 35.44%	71.7	67.23% to 75.78%	1.032
< 10.27	29.2	23.66% to 35.44%	71.46	66.99% to 75.55%	1.023
< 10.27	29.2	23.66% to 35.44%	70.75	66.25% to 74.88%	0.9986
< 10.27	29.2	23.66% to 35.44%	70.52	66.01% to 74.66%	0.9906
< 10.27	29.2	23.66% to 35.44%	70.28	65.77% to 74.44%	0.9827
< 10.28	29.2	23.66% to 35.44%	70.05	65.52% to 74.21%	0.975
< 10.29	29.2	23.66% to 35.44%	69.58	65.04% to 73.76%	0.9599
< 10.29	29.2	23.66% to 35.44%	69.34	64.79% to 73.54%	0.9525
< 10.29	29.2	23.66% to 35.44%	69.1	64.55% to 73.31%	0.9452
< 10.30	29.65	24.07% to 35.90%	69.1	64.55% to 73.31%	0.9595
< 10.30	30.09	24.48% to 36.36%	69.1	64.55% to 73.31%	0.9739
< 10.31	30.53	24.89% to 36.82%	69.1	64.55% to 73.31%	0.9882
< 10.31	30.97	25.31% to 37.28%	69.1	64.55% to 73.31%	1.002
< 10.31	30.97	25.31% to 37.28%	68.63	64.07% to 72.86%	0.9874
< 10.32	31.42	25.72% to 37.74%	68.63	64.07% to 72.86%	1.002
< 10.32	31.42	25.72% to 37.74%	68.4	63.82% to 72.64%	0.9941
< 10.32	31.42	25.72% to 37.74%	68.16	63.58% to 72.41%	0.9867
< 10.32	31.42	25.72% to 37.74%	67.92	63.34% to 72.19%	0.9794
< 10.33	31.86	26.13% to 38.19%	67.69	63.10% to 71.96%	0.986
< 10.33	31.86	26.13% to 38.19%	67.45	62.85% to 71.74%	0.9788
< 10.33	31.86	26.13% to 38.19%	67.22	62.61% to 71.51%	0.9718
< 10.33	32.3	26.54% to 38.65%	67.22	62.61% to 71.51%	0.9853
< 10.34	32.3	26.54% to 38.65%	66.98	62.37% to 71.29%	0.9783
< 10.34	32.74	26.96% to 39.11%	66.98	62.37% to 71.29%	0.9917
< 10.34	33.19	27.37% to 39.56%	66.98	62.37% to 71.29%	1.005
< 10.34	33.63	27.79% to 40.02%	66.98	62.37% to 71.29%	1.018
< 10.35	33.63	27.79% to 40.02%	66.75	62.13% to 71.06%	1.011
< 10.35	33.63	27.79% to 40.02%	66.51	61.89% to 70.84%	1.004
< 10.35	33.63	27.79% to 40.02%	66.27	61.65% to 70.61%	0.9971
< 10.35	34.07	28.20% to 40.47%	66.27	61.65% to 70.61%	1.01
< 10.36	34.96	29.04% to 41.38%	66.27	61.65% to 70.61%	1.036
< 10.36	35.4	29.46% to 41.83%	66.27	61.65% to 70.61%	1.05
< 10.36	35.4	29.46% to 41.83%	66.04	61.40% to 70.38%	1.042
< 10.37	35.84	29.87% to 42.28%	66.04	61.40% to 70.38%	1.055
< 10.37	36.28	30.29% to 42.73%	66.04	61.40% to 70.38%	1.068
< 10.37	36.28	30.29% to 42.73%	65.8	61.16% to 70.16%	1.061
< 10.37	36.28	30.29% to 42.73%	65.57	60.92% to 69.93%	1.054
< 10.37	36.28	30.29% to 42.73%	65.33	60.68% to 69.70%	1.047
< 10.38	36.28	30.29% to 42.73%	65.09	60.44% to 69.48%	1.039
< 10.38	36.28	30.29% to 42.73%	64.62	59.96% to 69.02%	1.026
< 10.38	36.73	30.71% to 43.18%	64.39	59.72% to 68.80%	1.031
< 10.39	37.17	31.13% to 43.63%	64.15	59.48% to 68.57%	1.037
< 10.39	37.61	31.55% to 44.08%	64.15	59.48% to 68.57%	1.049
< 10.39	37.61	31.55% to 44.08%	63.92	59.24% to 68.34%	1.042
< 10.39	38.05	31.97% to 44.53%	63.92	59.24% to 68.34%	1.055
< 10.39	38.5	32.39% to 44.98%	63.92	59.24% to 68.34%	1.067
< 10.40	38.5	32.39% to 44.98%	63.68	59.00% to 68.12%	1.06
< 10.40	38.5	32.39% to 44.98%	63.44	58.76% to 67.89%	1.053
< 10.40	38.5	32.39% to 44.98%	63.21	58.52% to 67.66%	1.046
< 10.41	38.5	32.39% to 44.98%	62.97	58.28% to 67.43%	1.04
< 10.41	38.94	32.82% to 45.43%	62.97	58.28% to 67.43%	1.052
< 10.41	39.82	33.66% to 46.32%	62.97	58.28% to 67.43%	1.075
< 10.41	40.27	34.09% to 46.77%	62.5	57.80% to 66.98%	1.074
< 10.42	40.71	34.51% to 47.22%	62.5	57.80% to 66.98%	1.086
< 10.42	40.71	34.51% to 47.22%	62.26	57.56% to 66.75%	1.079
< 10.42	41.15	34.93% to 47.66%	62.26	57.56% to 66.75%	1.09
< 10.43	41.59	35.36% to 48.11%	62.26	57.56% to 66.75%	1.102
< 10.43	42.48	36.21% to 49.00%	62.26	57.56% to 66.75%	1.126
< 10.43	42.48	36.21% to 49.00%	62.03	57.32% to 66.52%	1.119
< 10.43	42.48	36.21% to 49.00%	61.79	57.08% to 66.29%	1.112
< 10.44	42.48	36.21% to 49.00%	61.56	56.84% to 66.06%	1.105
< 10.44	42.92	36.64% to 49.44%	61.56	56.84% to 66.06%	1.116
< 10.44	43.36	37.07% to 49.88%	61.56	56.84% to 66.06%	1.128
< 10.44	43.36	37.07% to 49.88%	61.32	56.60% to 65.83%	1.121
< 10.45	43.36	37.07% to 49.88%	61.08	56.36% to 65.61%	1.114
< 10.45	43.36	37.07% to 49.88%	60.85	56.13% to 65.38%	1.108
< 10.46	43.81	37.49% to 50.32%	60.85	56.13% to 65.38%	1.119
< 10.46	43.81	37.49% to 50.32%	60.61	55.89% to 65.15%	1.112
< 10.46	44.25	37.92% to 50.77%	60.38	55.65% to 64.92%	1.117
< 10.46	44.25	37.92% to 50.77%	60.14	55.41% to 64.69%	1.11
< 10.47	44.25	37.92% to 50.77%	59.91	55.17% to 64.46%	1.104
< 10.47	44.25	37.92% to 50.77%	59.67	54.93% to 64.23%	1.097
< 10.48	44.25	37.92% to 50.77%	59.43	54.70% to 64.00%	1.091
< 10.48	44.25	37.92% to 50.77%	59.2	54.46% to 63.77%	1.084
< 10.48	44.69	38.35% to 51.21%	59.2	54.46% to 63.77%	1.095
< 10.49	44.69	38.35% to 51.21%	58.96	54.22% to 63.54%	1.089
< 10.49	45.13	38.78% to 51.65%	58.96	54.22% to 63.54%	1.1
< 10.50	45.58	39.21% to 52.09%	58.96	54.22% to 63.54%	1.111
< 10.50	45.58	39.21% to 52.09%	58.73	53.98% to 63.31%	1.104
< 10.51	46.46	40.07% to 52.97%	58.73	53.98% to 63.31%	1.126
< 10.51	46.9	40.50% to 53.41%	58.73	53.98% to 63.31%	1.136
< 10.51	46.9	40.50% to 53.41%	58.49	53.74% to 63.08%	1.13
< 10.52	46.9	40.50% to 53.41%	58.25	53.51% to 62.85%	1.124
< 10.52	47.79	41.37% to 54.28%	58.25	53.51% to 62.85%	1.145
< 10.52	47.79	41.37% to 54.28%	58.02	53.27% to 62.62%	1.138
< 10.52	47.79	41.37% to 54.28%	57.78	53.03% to 62.39%	1.132
< 10.53	48.23	41.80% to 54.72%	57.78	53.03% to 62.39%	1.142
< 10.53	48.23	41.80% to 54.72%	57.31	52.56% to 61.93%	1.13
< 10.53	48.23	41.80% to 54.72%	57.08	52.32% to 61.70%	1.124
< 10.53	48.67	42.23% to 55.16%	56.84	52.08% to 61.47%	1.128
< 10.53	49.12	42.67% to 55.59%	56.6	51.85% to 61.24%	1.132
< 10.54	49.56	43.10% to 56.03%	56.6	51.85% to 61.24%	1.142
< 10.54	50	43.54% to 56.46%	56.6	51.85% to 61.24%	1.152
< 10.55	50	43.54% to 56.46%	56.37	51.61% to 61.01%	1.146
< 10.55	50.44	43.97% to 56.90%	56.13	51.37% to 60.78%	1.15
< 10.55	50.44	43.97% to 56.90%	55.9	51.14% to 60.55%	1.144
< 10.56	50.44	43.97% to 56.90%	55.66	50.90% to 60.32%	1.138
< 10.56	50.88	44.41% to 57.33%	55.66	50.90% to 60.32%	1.148
< 10.56	51.33	44.84% to 57.77%	55.42	50.67% to 60.09%	1.151
< 10.57	51.33	44.84% to 57.77%	55.19	50.43% to 59.85%	1.145
< 10.57	51.33	44.84% to 57.77%	54.95	50.19% to 59.62%	1.139
< 10.57	51.77	45.28% to 58.20%	54.95	50.19% to 59.62%	1.149
< 10.57	52.21	45.72% to 58.63%	54.95	50.19% to 59.62%	1.159
< 10.57	52.65	46.16% to 59.07%	54.95	50.19% to 59.62%	1.169
< 10.58	52.65	46.16% to 59.07%	54.72	49.96% to 59.39%	1.163
< 10.58	53.1	46.59% to 59.50%	54.72	49.96% to 59.39%	1.173
< 10.59	53.54	47.03% to 59.93%	54.72	49.96% to 59.39%	1.182
< 10.59	53.54	47.03% to 59.93%	54.48	49.72% to 59.16%	1.176
< 10.59	53.54	47.03% to 59.93%	54.25	49.49% to 58.93%	1.17
< 10.59	53.98	47.47% to 60.36%	54.25	49.49% to 58.93%	1.18
< 10.59	53.98	47.47% to 60.36%	54.01	49.25% to 58.70%	1.174
< 10.59	54.42	47.91% to 60.79%	54.01	49.25% to 58.70%	1.183
< 10.60	54.42	47.91% to 60.79%	53.54	48.78% to 58.23%	1.171
< 10.60	54.42	47.91% to 60.79%	53.3	48.54% to 58.00%	1.165
< 10.60	54.42	47.91% to 60.79%	53.07	48.31% to 57.77%	1.16
< 10.60	54.42	47.91% to 60.79%	52.83	48.07% to 57.54%	1.154
< 10.60	54.87	48.35% to 61.22%	52.59	47.84% to 57.30%	1.157
< 10.61	55.31	48.79% to 61.65%	52.59	47.84% to 57.30%	1.167
< 10.61	55.75	49.23% to 62.08%	52.59	47.84% to 57.30%	1.176
< 10.62	55.75	49.23% to 62.08%	52.36	47.60% to 57.07%	1.17
< 10.62	55.75	49.23% to 62.08%	52.12	47.37% to 56.84%	1.164
< 10.62	55.75	49.23% to 62.08%	51.65	46.90% to 56.37%	1.153
< 10.62	56.19	49.68% to 62.51%	51.65	46.90% to 56.37%	1.162
< 10.63	56.64	50.12% to 62.93%	51.65	46.90% to 56.37%	1.171
< 10.63	56.64	50.12% to 62.93%	51.42	46.67% to 56.14%	1.166
< 10.63	56.64	50.12% to 62.93%	51.18	46.43% to 55.91%	1.16
< 10.64	56.64	50.12% to 62.93%	50.94	46.20% to 55.67%	1.155
< 10.64	56.64	50.12% to 62.93%	50.71	45.96% to 55.44%	1.149
< 10.64	56.64	50.12% to 62.93%	50.47	45.73% to 55.21%	1.144
< 10.65	56.64	50.12% to 62.93%	50.24	45.50% to 54.97%	1.138
< 10.65	56.64	50.12% to 62.93%	50	45.26% to 54.74%	1.133
< 10.65	57.08	50.56% to 63.36%	50	45.26% to 54.74%	1.142
< 10.66	57.08	50.56% to 63.36%	49.76	45.03% to 54.50%	1.136
< 10.66	57.08	50.56% to 63.36%	49.53	44.79% to 54.27%	1.131
< 10.66	57.08	50.56% to 63.36%	49.29	44.56% to 54.04%	1.126
< 10.66	57.08	50.56% to 63.36%	49.06	44.33% to 53.80%	1.12
< 10.66	57.52	51.00% to 63.79%	49.06	44.33% to 53.80%	1.129
< 10.67	57.96	51.45% to 64.21%	49.06	44.33% to 53.80%	1.138
< 10.67	57.96	51.45% to 64.21%	48.82	44.09% to 53.57%	1.133
< 10.67	58.41	51.89% to 64.64%	48.82	44.09% to 53.57%	1.141
< 10.68	58.41	51.89% to 64.64%	48.58	43.86% to 53.33%	1.136
< 10.68	58.85	52.34% to 65.07%	48.35	43.63% to 53.10%	1.139
< 10.68	58.85	52.34% to 65.07%	48.11	43.40% to 52.86%	1.134
< 10.68	59.73	53.23% to 65.91%	48.11	43.40% to 52.86%	1.151
< 10.69	60.18	53.68% to 66.34%	48.11	43.40% to 52.86%	1.16
< 10.69	60.18	53.68% to 66.34%	47.88	43.16% to 52.63%	1.155
< 10.70	60.18	53.68% to 66.34%	47.41	42.70% to 52.16%	1.144
< 10.70	60.18	53.68% to 66.34%	47.17	42.46% to 51.93%	1.139
< 10.70	60.62	54.12% to 66.76%	47.17	42.46% to 51.93%	1.147
< 10.70	61.06	54.57% to 67.18%	47.17	42.46% to 51.93%	1.156
< 10.70	61.5	55.02% to 67.61%	47.17	42.46% to 51.93%	1.164
< 10.71	61.5	55.02% to 67.61%	46.93	42.23% to 51.69%	1.159
< 10.71	61.5	55.02% to 67.61%	46.46	41.77% to 51.22%	1.149
< 10.72	61.95	55.47% to 68.03%	46.46	41.77% to 51.22%	1.157
< 10.72	61.95	55.47% to 68.03%	46.23	41.54% to 50.98%	1.152
< 10.73	62.39	55.92% to 68.45%	46.23	41.54% to 50.98%	1.16
< 10.73	62.39	55.92% to 68.45%	45.99	41.30% to 50.75%	1.155
< 10.73	62.39	55.92% to 68.45%	45.75	41.07% to 50.51%	1.15
< 10.74	62.83	56.37% to 68.87%	45.75	41.07% to 50.51%	1.158
< 10.74	63.27	56.82% to 69.29%	45.75	41.07% to 50.51%	1.166
< 10.75	63.72	57.27% to 69.71%	45.75	41.07% to 50.51%	1.175
< 10.75	64.16	57.72% to 70.13%	45.28	40.61% to 50.04%	1.173
< 10.75	64.16	57.72% to 70.13%	45.05	40.38% to 49.81%	1.168
< 10.76	64.16	57.72% to 70.13%	44.81	40.15% to 49.57%	1.163
< 10.76	64.6	58.17% to 70.54%	44.81	40.15% to 49.57%	1.171
< 10.76	65.04	58.62% to 70.96%	44.81	40.15% to 49.57%	1.179
< 10.76	65.49	59.08% to 71.38%	44.81	40.15% to 49.57%	1.187
< 10.77	65.49	59.08% to 71.38%	44.58	39.91% to 49.33%	1.182
< 10.77	65.49	59.08% to 71.38%	44.34	39.68% to 49.10%	1.177
< 10.77	65.49	59.08% to 71.38%	43.87	39.22% to 48.63%	1.167
< 10.78	65.49	59.08% to 71.38%	43.63	38.99% to 48.39%	1.162
< 10.78	65.93	59.53% to 71.80%	43.63	38.99% to 48.39%	1.17
< 10.78	66.37	59.98% to 72.21%	43.63	38.99% to 48.39%	1.177
< 10.79	66.81	60.44% to 72.63%	43.63	38.99% to 48.39%	1.185
< 10.79	67.7	61.35% to 73.46%	43.63	38.99% to 48.39%	1.201
< 10.79	68.14	61.81% to 73.87%	43.63	38.99% to 48.39%	1.209
< 10.80	68.14	61.81% to 73.87%	43.4	38.76% to 48.15%	1.204
< 10.80	68.58	62.26% to 74.28%	43.4	38.76% to 48.15%	1.212
< 10.81	68.58	62.26% to 74.28%	43.16	38.53% to 47.92%	1.207
< 10.81	69.03	62.72% to 74.69%	42.92	38.30% to 47.68%	1.209
< 10.81	69.47	63.18% to 75.11%	42.92	38.30% to 47.68%	1.217
< 10.82	69.91	63.64% to 75.52%	42.92	38.30% to 47.68%	1.225
< 10.82	69.91	63.64% to 75.52%	42.69	38.07% to 47.44%	1.22
< 10.82	70.35	64.10% to 75.93%	42.69	38.07% to 47.44%	1.228
< 10.82	70.35	64.10% to 75.93%	42.45	37.84% to 47.20%	1.223
< 10.83	70.35	64.10% to 75.93%	41.98	37.38% to 46.73%	1.213
< 10.83	70.8	64.56% to 76.34%	41.75	37.15% to 46.49%	1.215
< 10.84	71.24	65.02% to 76.75%	41.75	37.15% to 46.49%	1.223
< 10.85	71.68	65.48% to 77.15%	41.75	37.15% to 46.49%	1.23
< 10.85	71.68	65.48% to 77.15%	41.51	36.92% to 46.26%	1.226
< 10.85	72.12	65.95% to 77.56%	41.51	36.92% to 46.26%	1.233
< 10.85	72.57	66.41% to 77.97%	41.51	36.92% to 46.26%	1.241
< 10.86	73.01	66.87% to 78.38%	41.51	36.92% to 46.26%	1.248
< 10.86	73.45	67.34% to 78.78%	41.51	36.92% to 46.26%	1.256
< 10.86	73.45	67.34% to 78.78%	41.27	36.69% to 46.02%	1.251
< 10.86	73.45	67.34% to 78.78%	41.04	36.46% to 45.78%	1.246
< 10.87	73.45	67.34% to 78.78%	40.8	36.23% to 45.54%	1.241
< 10.87	73.45	67.34% to 78.78%	40.57	36.00% to 45.30%	1.236
< 10.88	73.45	67.34% to 78.78%	40.33	35.77% to 45.07%	1.231
< 10.88	73.45	67.34% to 78.78%	40.09	35.54% to 44.83%	1.226
< 10.88	73.45	67.34% to 78.78%	39.86	35.31% to 44.59%	1.221
< 10.88	73.45	67.34% to 78.78%	39.62	35.08% to 44.35%	1.217
< 10.88	73.45	67.34% to 78.78%	39.39	34.85% to 44.11%	1.212
< 10.89	73.45	67.34% to 78.78%	39.15	34.62% to 43.87%	1.207
< 10.90	73.89	67.80% to 79.19%	39.15	34.62% to 43.87%	1.214
< 10.90	73.89	67.80% to 79.19%	38.92	34.39% to 43.64%	1.21
< 10.90	73.89	67.80% to 79.19%	38.68	34.17% to 43.40%	1.205
< 10.90	73.89	67.80% to 79.19%	38.44	33.94% to 43.16%	1.2
< 10.90	73.89	67.80% to 79.19%	38.21	33.71% to 42.92%	1.196
< 10.91	74.34	68.27% to 79.59%	38.21	33.71% to 42.92%	1.203
< 10.91	74.34	68.27% to 79.59%	37.97	33.48% to 42.68%	1.198
< 10.91	74.78	68.73% to 79.99%	37.74	33.25% to 42.44%	1.201
< 10.91	75.22	69.20% to 80.40%	37.74	33.25% to 42.44%	1.208
< 10.91	75.22	69.20% to 80.40%	37.5	33.02% to 42.20%	1.204
< 10.92	75.66	69.67% to 80.80%	37.5	33.02% to 42.20%	1.211
< 10.92	75.66	69.67% to 80.80%	37.26	32.80% to 41.96%	1.206
< 10.92	76.11	70.14% to 81.20%	36.79	32.34% to 41.48%	1.204
< 10.93	76.11	70.14% to 81.20%	36.56	32.11% to 41.24%	1.2
< 10.93	76.55	70.61% to 81.60%	36.56	32.11% to 41.24%	1.207
< 10.93	76.55	70.61% to 81.60%	36.32	31.88% to 41.00%	1.202
< 10.93	76.99	71.08% to 82.00%	36.32	31.88% to 41.00%	1.209
< 10.94	77.43	71.55% to 82.40%	36.32	31.88% to 41.00%	1.216
< 10.95	77.43	71.55% to 82.40%	36.08	31.66% to 40.76%	1.212
< 10.95	77.43	71.55% to 82.40%	35.85	31.43% to 40.52%	1.207
< 10.95	77.43	71.55% to 82.40%	35.61	31.20% to 40.28%	1.203
< 10.96	77.43	71.55% to 82.40%	35.38	30.98% to 40.04%	1.198
< 10.96	77.88	72.02% to 82.80%	35.38	30.98% to 40.04%	1.205
< 10.96	78.32	72.50% to 83.19%	34.91	30.52% to 39.56%	1.203
< 10.96	78.76	72.97% to 83.59%	34.91	30.52% to 39.56%	1.21
< 10.96	78.76	72.97% to 83.59%	34.67	30.30% to 39.32%	1.206
< 10.97	78.76	72.97% to 83.59%	34.43	30.07% to 39.08%	1.201
< 10.97	79.2	73.45% to 83.98%	34.43	30.07% to 39.08%	1.208
< 10.97	79.65	73.92% to 84.38%	34.43	30.07% to 39.08%	1.215
< 10.98	79.65	73.92% to 84.38%	34.2	29.84% to 38.84%	1.21
< 10.98	80.09	74.40% to 84.77%	34.2	29.84% to 38.84%	1.217
< 10.99	80.09	74.40% to 84.77%	33.96	29.62% to 38.60%	1.213
< 10.99	80.09	74.40% to 84.77%	33.73	29.39% to 38.35%	1.208
< 10.99	80.09	74.40% to 84.77%	33.49	29.16% to 38.11%	1.204
< 10.99	80.09	74.40% to 84.77%	33.25	28.94% to 37.87%	1.2
< 10.99	80.53	74.88% to 85.17%	33.25	28.94% to 37.87%	1.207
< 10.99	80.53	74.88% to 85.17%	33.02	28.71% to 37.63%	1.202
< 11.00	80.53	74.88% to 85.17%	32.78	28.49% to 37.39%	1.198
< 11.00	80.53	74.88% to 85.17%	32.55	28.26% to 37.15%	1.194
< 11.00	80.53	74.88% to 85.17%	32.31	28.04% to 36.90%	1.19
< 11.00	80.97	75.36% to 85.56%	32.31	28.04% to 36.90%	1.196
< 11.00	80.97	75.36% to 85.56%	32.08	27.81% to 36.66%	1.192
< 11.01	81.42	75.83% to 85.95%	31.84	27.59% to 36.42%	1.194
< 11.01	81.86	76.32% to 86.34%	31.84	27.59% to 36.42%	1.201
< 11.02	82.3	76.80% to 86.72%	31.84	27.59% to 36.42%	1.207
< 11.02	82.74	77.28% to 87.11%	31.84	27.59% to 36.42%	1.214
< 11.02	83.19	77.76% to 87.50%	31.6	27.36% to 36.18%	1.216
< 11.02	83.19	77.76% to 87.50%	31.37	27.14% to 35.93%	1.212
< 11.03	83.63	78.25% to 87.88%	31.37	27.14% to 35.93%	1.219
< 11.03	83.63	78.25% to 87.88%	31.13	26.91% to 35.69%	1.214
< 11.03	84.07	78.74% to 88.27%	31.13	26.91% to 35.69%	1.221
< 11.03	84.07	78.74% to 88.27%	30.9	26.69% to 35.45%	1.217
< 11.03	84.07	78.74% to 88.27%	30.66	26.46% to 35.21%	1.212
< 11.03	84.07	78.74% to 88.27%	30.42	26.24% to 34.96%	1.208
< 11.04	84.51	79.22% to 88.65%	30.42	26.24% to 34.96%	1.215
< 11.05	84.51	79.22% to 88.65%	29.95	25.79% to 34.48%	1.207
< 11.05	84.51	79.22% to 88.65%	29.72	25.56% to 34.23%	1.202
< 11.05	84.51	79.22% to 88.65%	29.48	25.34% to 33.99%	1.198
< 11.05	84.51	79.22% to 88.65%	29.25	25.12% to 33.75%	1.194
< 11.05	84.51	79.22% to 88.65%	29.01	24.89% to 33.50%	1.19
< 11.06	84.51	79.22% to 88.65%	28.77	24.67% to 33.26%	1.187
< 11.07	84.96	79.71% to 89.03%	28.77	24.67% to 33.26%	1.193
< 11.08	85.4	80.20% to 89.41%	28.77	24.67% to 33.26%	1.199
< 11.08	85.84	80.69% to 89.79%	28.77	24.67% to 33.26%	1.205
< 11.08	85.84	80.69% to 89.79%	28.54	24.45% to 33.01%	1.201
< 11.09	85.84	80.69% to 89.79%	28.3	24.22% to 32.77%	1.197
< 11.09	85.84	80.69% to 89.79%	28.07	24.00% to 32.53%	1.193
< 11.09	85.84	80.69% to 89.79%	27.83	23.78% to 32.28%	1.189
< 11.09	85.84	80.69% to 89.79%	27.59	23.56% to 32.04%	1.186
< 11.10	85.84	80.69% to 89.79%	27.36	23.33% to 31.79%	1.182
< 11.10	85.84	80.69% to 89.79%	27.12	23.11% to 31.55%	1.178
< 11.10	86.28	81.19% to 90.17%	27.12	23.11% to 31.55%	1.184
< 11.10	86.28	81.19% to 90.17%	26.89	22.89% to 31.30%	1.18
< 11.11	86.73	81.68% to 90.54%	26.89	22.89% to 31.30%	1.186
< 11.11	87.17	82.18% to 90.92%	26.65	22.67% to 31.06%	1.188
< 11.11	87.17	82.18% to 90.92%	26.42	22.44% to 30.81%	1.185
< 11.11	87.17	82.18% to 90.92%	26.18	22.22% to 30.56%	1.181
< 11.12	87.17	82.18% to 90.92%	25.94	22.00% to 30.32%	1.177
< 11.12	87.17	82.18% to 90.92%	25.71	21.78% to 30.07%	1.173
< 11.12	87.61	82.68% to 91.29%	25.71	21.78% to 30.07%	1.179
< 11.12	87.61	82.68% to 91.29%	25.47	21.56% to 29.83%	1.176
< 11.13	87.61	82.68% to 91.29%	25.24	21.34% to 29.58%	1.172
< 11.13	87.61	82.68% to 91.29%	25	21.12% to 29.33%	1.168
< 11.13	87.61	82.68% to 91.29%	24.76	20.89% to 29.09%	1.164
< 11.13	88.05	83.18% to 91.66%	24.76	20.89% to 29.09%	1.17
< 11.14	88.05	83.18% to 91.66%	24.53	20.67% to 28.84%	1.167
< 11.15	88.05	83.18% to 91.66%	24.29	20.45% to 28.59%	1.163
< 11.16	88.05	83.18% to 91.66%	24.06	20.23% to 28.35%	1.159
< 11.16	88.5	83.68% to 92.03%	24.06	20.23% to 28.35%	1.165
< 11.16	88.5	83.68% to 92.03%	23.82	20.01% to 28.10%	1.162
< 11.17	88.5	83.68% to 92.03%	23.58	19.79% to 27.85%	1.158
< 11.17	88.5	83.68% to 92.03%	23.35	19.57% to 27.60%	1.155
< 11.18	88.5	83.68% to 92.03%	23.11	19.35% to 27.36%	1.151
< 11.18	88.5	83.68% to 92.03%	22.88	19.13% to 27.11%	1.147
< 11.19	88.5	83.68% to 92.03%	22.64	18.91% to 26.86%	1.144
< 11.21	88.94	84.18% to 92.39%	22.64	18.91% to 26.86%	1.15
< 11.21	88.94	84.18% to 92.39%	22.41	18.69% to 26.61%	1.146
< 11.21	88.94	84.18% to 92.39%	22.17	18.48% to 26.36%	1.143
< 11.21	88.94	84.18% to 92.39%	21.93	18.26% to 26.12%	1.139
< 11.22	88.94	84.18% to 92.39%	21.7	18.04% to 25.87%	1.136
< 11.22	88.94	84.18% to 92.39%	21.46	17.82% to 25.62%	1.132
< 11.22	89.38	84.69% to 92.76%	21.46	17.82% to 25.62%	1.138
< 11.23	89.82	85.19% to 93.12%	21.46	17.82% to 25.62%	1.144
< 11.23	90.27	85.70% to 93.48%	21.46	17.82% to 25.62%	1.149
< 11.24	90.71	86.21% to 93.84%	21.46	17.82% to 25.62%	1.155
< 11.24	90.71	86.21% to 93.84%	21.23	17.60% to 25.37%	1.152
< 11.24	90.71	86.21% to 93.84%	20.99	17.38% to 25.12%	1.148
< 11.25	90.71	86.21% to 93.84%	20.75	17.17% to 24.87%	1.145
< 11.25	90.71	86.21% to 93.84%	20.52	16.95% to 24.62%	1.141
< 11.26	90.71	86.21% to 93.84%	20.28	16.73% to 24.37%	1.138
< 11.26	91.15	86.73% to 94.20%	20.28	16.73% to 24.37%	1.143
< 11.27	91.15	86.73% to 94.20%	20.05	16.51% to 24.12%	1.14
< 11.27	91.59	87.24% to 94.55%	20.05	16.51% to 24.12%	1.146
< 11.27	91.59	87.24% to 94.55%	19.81	16.30% to 23.87%	1.142
< 11.29	91.59	87.24% to 94.55%	19.58	16.08% to 23.62%	1.139
< 11.30	92.04	87.76% to 94.90%	19.58	16.08% to 23.62%	1.144
< 11.31	92.48	88.29% to 95.25%	19.58	16.08% to 23.62%	1.15
< 11.31	92.48	88.29% to 95.25%	19.34	15.86% to 23.37%	1.147
< 11.32	92.48	88.29% to 95.25%	19.1	15.65% to 23.12%	1.143
< 11.32	92.48	88.29% to 95.25%	18.87	15.43% to 22.87%	1.14
< 11.32	92.48	88.29% to 95.25%	18.63	15.21% to 22.61%	1.137
< 11.32	92.92	88.81% to 95.60%	18.63	15.21% to 22.61%	1.142
< 11.33	92.92	88.81% to 95.60%	18.4	15.00% to 22.36%	1.139
< 11.33	93.36	89.34% to 95.94%	18.4	15.00% to 22.36%	1.144
< 11.33	93.36	89.34% to 95.94%	18.16	14.78% to 22.11%	1.141
< 11.33	93.81	89.87% to 96.27%	18.16	14.78% to 22.11%	1.146
< 11.34	93.81	89.87% to 96.27%	17.92	14.57% to 21.86%	1.143
< 11.34	93.81	89.87% to 96.27%	17.69	14.35% to 21.61%	1.14
< 11.34	94.25	90.41% to 96.61%	17.69	14.35% to 21.61%	1.145
< 11.35	94.25	90.41% to 96.61%	17.45	14.14% to 21.35%	1.142
< 11.36	94.25	90.41% to 96.61%	17.22	13.92% to 21.10%	1.138
< 11.36	94.25	90.41% to 96.61%	16.98	13.71% to 20.85%	1.135
< 11.36	94.25	90.41% to 96.61%	16.75	13.49% to 20.59%	1.132
< 11.36	94.25	90.41% to 96.61%	16.51	13.28% to 20.34%	1.129
< 11.37	94.25	90.41% to 96.61%	16.27	13.07% to 20.09%	1.126
< 11.37	94.25	90.41% to 96.61%	16.04	12.85% to 19.83%	1.123
< 11.37	94.69	90.95% to 96.94%	16.04	12.85% to 19.83%	1.128
< 11.39	94.69	90.95% to 96.94%	15.8	12.64% to 19.58%	1.125
< 11.40	94.69	90.95% to 96.94%	15.57	12.43% to 19.32%	1.121
< 11.40	94.69	90.95% to 96.94%	15.33	12.21% to 19.07%	1.118
< 11.41	94.69	90.95% to 96.94%	15.09	12.00% to 18.81%	1.115
< 11.42	94.69	90.95% to 96.94%	14.62	11.58% to 18.30%	1.109
< 11.43	94.69	90.95% to 96.94%	14.39	11.37% to 18.05%	1.106
< 11.44	95.13	91.50% to 97.26%	14.39	11.37% to 18.05%	1.111
< 11.44	95.13	91.50% to 97.26%	14.15	11.15% to 17.79%	1.108
< 11.44	95.58	92.05% to 97.58%	14.15	11.15% to 17.79%	1.113
< 11.45	95.58	92.05% to 97.58%	13.92	10.94% to 17.53%	1.11
< 11.46	95.58	92.05% to 97.58%	13.68	10.73% to 17.28%	1.107
< 11.48	95.58	92.05% to 97.58%	13.21	10.31% to 16.76%	1.101
< 11.50	95.58	92.05% to 97.58%	12.97	10.10% to 16.51%	1.098
< 11.50	95.58	92.05% to 97.58%	12.74	9.894% to 16.25%	1.095
< 11.51	95.58	92.05% to 97.58%	12.5	9.685% to 15.99%	1.092
< 11.51	95.58	92.05% to 97.58%	12.26	9.476% to 15.73%	1.089
< 11.52	95.58	92.05% to 97.58%	12.03	9.268% to 15.47%	1.086
< 11.52	95.58	92.05% to 97.58%	11.79	9.060% to 15.21%	1.084
< 11.53	95.58	92.05% to 97.58%	11.56	8.853% to 14.95%	1.081
< 11.55	96.02	92.61% to 97.89%	11.56	8.853% to 14.95%	1.086
< 11.56	96.02	92.61% to 97.89%	11.32	8.646% to 14.69%	1.083
< 11.56	96.02	92.61% to 97.89%	11.08	8.439% to 14.43%	1.08
< 11.57	96.02	92.61% to 97.89%	10.85	8.233% to 14.17%	1.077
< 11.58	96.02	92.61% to 97.89%	10.61	8.027% to 13.91%	1.074
< 11.58	96.46	93.17% to 98.20%	10.61	8.027% to 13.91%	1.079
< 11.59	96.46	93.17% to 98.20%	10.38	7.822% to 13.64%	1.076
< 11.59	96.46	93.17% to 98.20%	10.14	7.617% to 13.38%	1.073
< 11.60	96.46	93.17% to 98.20%	9.906	7.412% to 13.12%	1.071
< 11.62	96.46	93.17% to 98.20%	9.67	7.208% to 12.86%	1.068
< 11.63	96.46	93.17% to 98.20%	9.434	7.005% to 12.59%	1.065
< 11.64	96.46	93.17% to 98.20%	9.198	6.802% to 12.33%	1.062
< 11.64	96.46	93.17% to 98.20%	8.962	6.599% to 12.06%	1.06
< 11.65	96.9	93.75% to 98.49%	8.962	6.599% to 12.06%	1.064
< 11.66	97.35	94.33% to 98.78%	8.962	6.599% to 12.06%	1.069
< 11.67	97.35	94.33% to 98.78%	8.726	6.397% to 11.80%	1.067
< 11.68	97.35	94.33% to 98.78%	8.491	6.196% to 11.53%	1.064
< 11.68	97.35	94.33% to 98.78%	8.255	5.995% to 11.26%	1.061
< 11.69	97.35	94.33% to 98.78%	8.019	5.795% to 11.00%	1.058
< 11.71	97.35	94.33% to 98.78%	7.783	5.595% to 10.73%	1.056
< 11.71	97.35	94.33% to 98.78%	7.547	5.396% to 10.46%	1.053
< 11.72	97.35	94.33% to 98.78%	7.311	5.198% to 10.19%	1.05
< 11.74	97.35	94.33% to 98.78%	7.075	5.001% to 9.921%	1.048
< 11.75	97.35	94.33% to 98.78%	6.84	4.804% to 9.650%	1.045
< 11.76	97.79	94.93% to 99.05%	6.84	4.804% to 9.650%	1.05
< 11.78	98.23	95.54% to 99.31%	6.84	4.804% to 9.650%	1.054
< 11.79	98.23	95.54% to 99.31%	6.604	4.608% to 9.379%	1.052
< 11.80	98.67	96.17% to 99.64%	6.604	4.608% to 9.379%	1.056
< 11.83	98.67	96.17% to 99.64%	6.368	4.413% to 9.106%	1.054
< 11.85	98.67	96.17% to 99.64%	6.132	4.219% to 8.833%	1.051
< 11.86	99.12	96.83% to 99.84%	6.132	4.219% to 8.833%	1.056
< 11.87	99.12	96.83% to 99.84%	5.896	4.025% to 8.559%	1.053
< 11.87	99.12	96.83% to 99.84%	5.66	3.833% to 8.284%	1.051
< 11.88	99.12	96.83% to 99.84%	5.425	3.642% to 8.008%	1.048
< 11.89	99.12	96.83% to 99.84%	5.189	3.451% to 7.731%	1.045
< 11.90	99.12	96.83% to 99.84%	4.953	3.262% to 7.453%	1.043
< 11.91	99.12	96.83% to 99.84%	4.717	3.074% to 7.173%	1.04
< 11.93	99.12	96.83% to 99.84%	4.481	2.887% to 6.892%	1.038
< 11.94	99.12	96.83% to 99.84%	4.245	2.702% to 6.610%	1.035
< 11.95	99.12	96.83% to 99.84%	4.009	2.518% to 6.327%	1.033
< 11.95	99.12	96.83% to 99.84%	3.774	2.336% to 6.041%	1.03
< 11.96	99.56	97.54% to 99.98%	3.774	2.336% to 6.041%	1.035
< 11.98	99.56	97.54% to 99.98%	3.538	2.155% to 5.754%	1.032
< 12.00	99.56	97.54% to 99.98%	3.302	1.977% to 5.465%	1.03
< 12.01	99.56	97.54% to 99.98%	3.066	1.800% to 5.174%	1.027
< 12.04	99.56	97.54% to 99.98%	2.83	1.626% to 4.881%	1.025
< 12.08	99.56	97.54% to 99.98%	2.594	1.455% to 4.585%	1.022
< 12.13	99.56	97.54% to 99.98%	2.358	1.286% to 4.286%	1.02
< 12.18	99.56	97.54% to 99.98%	2.123	1.121% to 3.984%	1.017
< 12.21	99.56	97.54% to 99.98%	1.887	0.9591% to 3.678%	1.015
< 12.25	99.56	97.54% to 99.98%	1.651	0.8020% to 3.368%	1.012
< 12.29	99.56	97.54% to 99.98%	1.415	0.6501% to 3.053%	1.01
< 12.30	99.56	97.54% to 99.98%	1.179	0.5047% to 2.730%	1.007
< 12.33	99.56	97.54% to 99.98%	0.9434	0.3675% to 2.400%	1.005
< 12.39	100	98.33% to 100.0%	0.9434	0.3675% to 2.400%	1.01
< 12.66	100	98.33% to 100.0%	0.7075	0.1929% to 2.059%	1.007
< 12.95	100	98.33% to 100.0%	0.4717	0.08381% to 1.703%	1.005
< 13.11	100	98.33% to 100.0%	0.2358	0.01210% to 1.324%	1.002

## Sheet: CPSF6
	Sensitivity%	95% CI	Specificity%	95% CI	Likelihood ratio
< 8.165	0	0.000% to 7.270%	99.72	98.40% to 99.99%	0
< 8.590	0	0.000% to 7.270%	99.43	97.95% to 99.90%	0
< 8.755	0	0.000% to 7.270%	99.15	97.52% to 99.77%	0
< 8.825	0	0.000% to 7.270%	98.86	97.11% to 99.56%	0
< 8.880	2.041	0.1047% to 10.69%	98.86	97.11% to 99.56%	1.791
< 8.950	2.041	0.1047% to 10.69%	98.58	96.71% to 99.39%	1.433
< 9.025	4.082	0.7252% to 13.71%	98.58	96.71% to 99.39%	2.865
< 9.055	4.082	0.7252% to 13.71%	98.29	96.32% to 99.21%	2.388
< 9.065	4.082	0.7252% to 13.71%	98.01	95.94% to 99.03%	2.047
< 9.085	6.122	2.104% to 16.52%	98.01	95.94% to 99.03%	3.07
< 9.115	8.163	3.220% to 19.19%	97.72	95.57% to 98.84%	3.582
< 9.135	10.2	4.438% to 21.76%	97.72	95.57% to 98.84%	4.477
< 9.170	12.24	5.735% to 24.24%	97.72	95.57% to 98.84%	5.372
< 9.205	12.24	5.735% to 24.24%	97.15	94.84% to 98.45%	4.298
< 9.215	18.37	9.976% to 31.36%	97.15	94.84% to 98.45%	6.447
< 9.230	20.41	11.48% to 33.64%	97.15	94.84% to 98.45%	7.163
< 9.245	22.45	13.02% to 35.88%	97.15	94.84% to 98.45%	7.88
< 9.255	24.49	14.60% to 38.09%	96.87	94.48% to 98.24%	7.814
< 9.265	26.53	16.21% to 40.26%	96.87	94.48% to 98.24%	8.466
< 9.275	26.53	16.21% to 40.26%	96.3	93.77% to 97.82%	7.163
< 9.285	28.57	17.85% to 42.41%	95.73	93.07% to 97.39%	6.686
< 9.300	30.61	19.52% to 44.53%	95.44	92.72% to 97.17%	6.716
< 9.320	32.65	21.21% to 46.62%	95.44	92.72% to 97.17%	7.163
< 9.340	34.69	22.92% to 48.69%	95.16	92.38% to 96.95%	7.163
< 9.355	38.78	26.43% to 52.75%	95.16	92.38% to 96.95%	8.006
< 9.375	38.78	26.43% to 52.75%	94.87	92.04% to 96.73%	7.561
< 9.395	38.78	26.43% to 52.75%	94.59	91.70% to 96.51%	7.163
< 9.405	38.78	26.43% to 52.75%	94.3	91.36% to 96.28%	6.805
< 9.415	38.78	26.43% to 52.75%	94.02	91.03% to 96.05%	6.481
< 9.425	42.86	30.02% to 56.73%	93.73	90.69% to 95.82%	6.838
< 9.435	44.9	31.85% to 58.68%	92.88	89.70% to 95.13%	6.304
< 9.450	44.9	31.85% to 58.68%	92.31	89.04% to 94.66%	5.837
< 9.465	44.9	31.85% to 58.68%	92.02	88.71% to 94.42%	5.628
< 9.475	44.9	31.85% to 58.68%	91.17	87.74% to 93.71%	5.084
< 9.485	44.9	31.85% to 58.68%	90.31	86.77% to 92.99%	4.635
< 9.495	44.9	31.85% to 58.68%	89.46	85.81% to 92.26%	4.259
< 9.505	51.02	37.47% to 64.42%	88.6	84.85% to 91.52%	4.477
< 9.515	51.02	37.47% to 64.42%	88.03	84.22% to 91.02%	4.264
< 9.525	55.1	41.32% to 68.15%	87.75	83.90% to 90.78%	4.498
< 9.535	55.1	41.32% to 68.15%	87.46	83.59% to 90.53%	4.396
< 9.545	57.14	43.27% to 69.98%	86.89	82.96% to 90.03%	4.36
< 9.555	59.18	45.25% to 71.78%	86.32	82.34% to 89.53%	4.328
< 9.565	61.22	47.25% to 73.57%	86.04	82.02% to 89.28%	4.386
< 9.575	61.22	47.25% to 73.57%	85.19	81.09% to 88.52%	4.133
< 9.585	61.22	47.25% to 73.57%	84.62	80.47% to 88.01%	3.98
< 9.595	61.22	47.25% to 73.57%	84.05	79.85% to 87.50%	3.837
< 9.605	63.27	49.27% to 75.33%	83.19	78.92% to 86.74%	3.764
< 9.615	63.27	49.27% to 75.33%	81.77	77.39% to 85.45%	3.47
< 9.625	63.27	49.27% to 75.33%	81.2	76.78% to 84.94%	3.365
< 9.635	65.31	51.31% to 77.08%	80.63	76.17% to 84.42%	3.371
< 9.645	65.31	51.31% to 77.08%	80.34	75.87% to 84.16%	3.322
< 9.655	65.31	51.31% to 77.08%	80.06	75.56% to 83.90%	3.275
< 9.665	65.31	51.31% to 77.08%	79.77	75.26% to 83.64%	3.229
< 9.675	71.43	57.59% to 82.15%	78.35	73.74% to 82.34%	3.299
< 9.685	73.47	59.74% to 83.79%	77.21	72.54% to 81.29%	3.223
< 9.695	75.51	61.91% to 85.40%	77.21	72.54% to 81.29%	3.313
< 9.705	75.51	61.91% to 85.40%	75.5	70.74% to 79.71%	3.082
< 9.715	75.51	61.91% to 85.40%	74.36	69.54% to 78.65%	2.945
< 9.725	77.55	64.12% to 86.98%	74.07	69.25% to 78.38%	2.991
< 9.740	77.55	64.12% to 86.98%	73.5	68.65% to 77.85%	2.927
< 9.755	77.55	64.12% to 86.98%	72.65	67.76% to 77.05%	2.835
< 9.765	77.55	64.12% to 86.98%	71.51	66.57% to 75.98%	2.722
< 9.775	79.59	66.36% to 88.52%	70.66	65.69% to 75.17%	2.712
< 9.785	79.59	66.36% to 88.52%	69.8	64.80% to 74.37%	2.636
< 9.795	81.63	68.64% to 90.02%	69.23	64.22% to 73.83%	2.653
< 9.805	83.67	70.96% to 91.49%	68.66	63.63% to 73.29%	2.67
< 9.815	83.67	70.96% to 91.49%	67.24	62.16% to 71.94%	2.554
< 9.825	83.67	70.96% to 91.49%	65.81	60.70% to 70.58%	2.447
< 9.835	85.71	73.33% to 92.90%	65.24	60.12% to 70.03%	2.466
< 9.845	89.8	78.24% to 95.56%	64.67	59.54% to 69.49%	2.542
< 9.855	89.8	78.24% to 95.56%	64.39	59.25% to 69.22%	2.521
< 9.865	91.84	80.81% to 96.78%	63.53	58.38% to 68.40%	2.518
< 9.875	91.84	80.81% to 96.78%	62.96	57.80% to 67.85%	2.48
< 9.885	91.84	80.81% to 96.78%	62.11	56.93% to 67.03%	2.424
< 9.895	91.84	80.81% to 96.78%	61.54	56.35% to 66.48%	2.388
< 9.905	93.88	83.48% to 97.90%	60.68	55.48% to 65.65%	2.388
< 9.915	93.88	83.48% to 97.90%	59.83	54.62% to 64.82%	2.337
< 9.925	95.92	86.29% to 99.27%	58.4	53.18% to 63.44%	2.306
< 9.935	95.92	86.29% to 99.27%	56.98	51.75% to 62.06%	2.23
< 9.945	95.92	86.29% to 99.27%	56.7	51.47% to 61.78%	2.215
< 9.955	95.92	86.29% to 99.27%	55.56	50.32% to 60.67%	2.158
< 9.965	95.92	86.29% to 99.27%	54.99	49.76% to 60.11%	2.131
< 9.975	95.92	86.29% to 99.27%	53.85	48.62% to 58.99%	2.078
< 9.985	95.92	86.29% to 99.27%	52.99	47.77% to 58.15%	2.04
< 9.995	95.92	86.29% to 99.27%	52.14	46.92% to 57.31%	2.004
< 10.01	95.92	86.29% to 99.27%	51.57	46.35% to 56.75%	1.98
< 10.02	95.92	86.29% to 99.27%	50.71	45.50% to 55.91%	1.946
< 10.03	95.92	86.29% to 99.27%	49.57	44.38% to 54.78%	1.902
< 10.04	95.92	86.29% to 99.27%	49	43.81% to 54.21%	1.881
< 10.05	95.92	86.29% to 99.27%	47.86	42.69% to 53.08%	1.84
< 10.06	95.92	86.29% to 99.27%	47.01	41.85% to 52.23%	1.81
< 10.07	95.92	86.29% to 99.27%	46.15	41.01% to 51.38%	1.781
< 10.08	97.96	89.31% to 99.90%	46.15	41.01% to 51.38%	1.819
< 10.09	97.96	89.31% to 99.90%	45.58	40.45% to 50.81%	1.8
< 10.10	97.96	89.31% to 99.90%	44.44	39.33% to 49.68%	1.763
< 10.11	97.96	89.31% to 99.90%	43.02	37.94% to 48.25%	1.719
< 10.12	97.96	89.31% to 99.90%	41.88	36.83% to 47.10%	1.685
< 10.13	97.96	89.31% to 99.90%	39.32	34.35% to 44.52%	1.614
< 10.14	97.96	89.31% to 99.90%	39.03	34.07% to 44.23%	1.607
< 10.15	97.96	89.31% to 99.90%	38.18	33.25% to 43.36%	1.585
< 10.16	97.96	89.31% to 99.90%	37.89	32.97% to 43.07%	1.577
< 10.17	97.96	89.31% to 99.90%	37.32	32.42% to 42.49%	1.563
< 10.18	97.96	89.31% to 99.90%	36.18	31.33% to 41.33%	1.535
< 10.20	97.96	89.31% to 99.90%	35.04	30.24% to 40.17%	1.508
< 10.21	97.96	89.31% to 99.90%	34.47	29.69% to 39.59%	1.495
< 10.22	97.96	89.31% to 99.90%	33.33	28.61% to 38.42%	1.469
< 10.23	97.96	89.31% to 99.90%	33.05	28.33% to 38.13%	1.463
< 10.24	97.96	89.31% to 99.90%	32.19	27.52% to 37.25%	1.445
< 10.25	97.96	89.31% to 99.90%	31.91	27.25% to 36.96%	1.439
< 10.26	97.96	89.31% to 99.90%	31.34	26.71% to 36.37%	1.427
< 10.27	97.96	89.31% to 99.90%	30.77	26.17% to 35.78%	1.415
< 10.28	97.96	89.31% to 99.90%	29.63	25.09% to 34.61%	1.392
< 10.29	97.96	89.31% to 99.90%	28.77	24.29% to 33.72%	1.375
< 10.30	97.96	89.31% to 99.90%	28.21	23.75% to 33.13%	1.364
< 10.31	97.96	89.31% to 99.90%	27.35	22.95% to 32.24%	1.348
< 10.33	100	92.73% to 100.0%	26.5	22.15% to 31.35%	1.36
< 10.34	100	92.73% to 100.0%	25.36	21.09% to 30.16%	1.34
< 10.36	100	92.73% to 100.0%	24.79	20.56% to 29.56%	1.33
< 10.37	100	92.73% to 100.0%	23.65	19.50% to 28.36%	1.31
< 10.38	100	92.73% to 100.0%	23.08	18.97% to 27.76%	1.3
< 10.39	100	92.73% to 100.0%	22.79	18.71% to 27.46%	1.295
< 10.41	100	92.73% to 100.0%	22.22	18.19% to 26.86%	1.286
< 10.42	100	92.73% to 100.0%	21.65	17.66% to 26.26%	1.276
< 10.43	100	92.73% to 100.0%	20.51	16.62% to 25.05%	1.258
< 10.44	100	92.73% to 100.0%	19.37	15.58% to 23.83%	1.24
< 10.45	100	92.73% to 100.0%	19.09	15.32% to 23.53%	1.236
< 10.47	100	92.73% to 100.0%	18.8	15.06% to 23.22%	1.232
< 10.49	100	92.73% to 100.0%	18.23	14.55% to 22.61%	1.223
< 10.50	100	92.73% to 100.0%	17.66	14.03% to 22.00%	1.215
< 10.51	100	92.73% to 100.0%	17.09	13.52% to 21.38%	1.206
< 10.52	100	92.73% to 100.0%	16.52	13.01% to 20.77%	1.198
< 10.53	100	92.73% to 100.0%	16.24	12.75% to 20.46%	1.194
< 10.54	100	92.73% to 100.0%	15.67	12.24% to 19.84%	1.186
< 10.55	100	92.73% to 100.0%	15.38	11.99% to 19.53%	1.182
< 10.57	100	92.73% to 100.0%	13.96	10.72% to 17.98%	1.162
< 10.58	100	92.73% to 100.0%	13.11	9.971% to 17.04%	1.151
< 10.60	100	92.73% to 100.0%	11.68	8.728% to 15.46%	1.132
< 10.61	100	92.73% to 100.0%	11.11	8.235% to 14.83%	1.125
< 10.63	100	92.73% to 100.0%	10.54	7.745% to 14.19%	1.118
< 10.64	100	92.73% to 100.0%	9.972	7.257% to 13.55%	1.111
< 10.67	100	92.73% to 100.0%	9.117	6.532% to 12.59%	1.1
< 10.70	100	92.73% to 100.0%	8.832	6.292% to 12.26%	1.097
< 10.71	100	92.73% to 100.0%	8.262	5.814% to 11.61%	1.09
< 10.72	100	92.73% to 100.0%	7.977	5.577% to 11.29%	1.087
< 10.73	100	92.73% to 100.0%	7.692	5.340% to 10.96%	1.083
< 10.74	100	92.73% to 100.0%	7.123	4.871% to 10.30%	1.077
< 10.75	100	92.73% to 100.0%	6.838	4.638% to 9.972%	1.073
< 10.76	100	92.73% to 100.0%	6.268	4.175% to 9.307%	1.067
< 10.78	100	92.73% to 100.0%	5.983	3.946% to 8.973%	1.064
< 10.82	100	92.73% to 100.0%	4.843	3.046% to 7.619%	1.051
< 10.85	100	92.73% to 100.0%	4.558	2.825% to 7.276%	1.048
< 10.86	100	92.73% to 100.0%	4.274	2.607% to 6.930%	1.045
< 10.88	100	92.73% to 100.0%	3.989	2.391% to 6.583%	1.042
< 10.89	100	92.73% to 100.0%	3.419	1.966% to 5.880%	1.035
< 10.91	100	92.73% to 100.0%	3.134	1.759% to 5.524%	1.032
< 10.93	100	92.73% to 100.0%	2.564	1.355% to 4.801%	1.026
< 10.97	100	92.73% to 100.0%	1.994	0.9693% to 4.059%	1.02
< 11.02	100	92.73% to 100.0%	1.709	0.7857% to 3.679%	1.017
< 11.06	100	92.73% to 100.0%	1.425	0.6100% to 3.291%	1.014
< 11.07	100	92.73% to 100.0%	1.14	0.4440% to 2.893%	1.012
< 11.10	100	92.73% to 100.0%	0.8547	0.2330% to 2.482%	1.009
< 11.21	100	92.73% to 100.0%	0.5698	0.1012% to 2.053%	1.006
< 11.57	100	92.73% to 100.0%	0.2849	0.01461% to 1.596%	1.003

## Sheet: CPSF7
	Sensitivity%	95% CI	Specificity%	95% CI	Likelihood ratio
< 8.985	0	0.000% to 7.270%	99.72	98.40% to 99.99%	0
< 9.105	0	0.000% to 7.270%	99.43	97.95% to 99.90%	0
< 9.185	0	0.000% to 7.270%	99.15	97.52% to 99.77%	0
< 9.215	0	0.000% to 7.270%	98.86	97.11% to 99.56%	0
< 9.255	0	0.000% to 7.270%	98.58	96.71% to 99.39%	0
< 9.285	2.041	0.1047% to 10.69%	98.58	96.71% to 99.39%	1.433
< 9.320	2.041	0.1047% to 10.69%	98.29	96.32% to 99.21%	1.194
< 9.380	2.041	0.1047% to 10.69%	97.72	95.57% to 98.84%	0.8954
< 9.480	2.041	0.1047% to 10.69%	97.15	94.84% to 98.45%	0.7163
< 9.560	2.041	0.1047% to 10.69%	96.87	94.48% to 98.24%	0.6512
< 9.585	2.041	0.1047% to 10.69%	96.58	94.12% to 98.03%	0.5969
< 9.605	2.041	0.1047% to 10.69%	96.3	93.77% to 97.82%	0.551
< 9.615	2.041	0.1047% to 10.69%	96.01	93.42% to 97.61%	0.5117
< 9.645	4.082	0.7252% to 13.71%	96.01	93.42% to 97.61%	1.023
< 9.675	4.082	0.7252% to 13.71%	95.73	93.07% to 97.39%	0.9551
< 9.690	4.082	0.7252% to 13.71%	95.44	92.72% to 97.17%	0.8954
< 9.730	4.082	0.7252% to 13.71%	95.16	92.38% to 96.95%	0.8427
< 9.775	6.122	2.104% to 16.52%	94.87	92.04% to 96.73%	1.194
< 9.810	6.122	2.104% to 16.52%	94.59	91.70% to 96.51%	1.131
< 9.835	6.122	2.104% to 16.52%	94.3	91.36% to 96.28%	1.074
< 9.845	8.163	3.220% to 19.19%	93.73	90.69% to 95.82%	1.302
< 9.855	8.163	3.220% to 19.19%	93.45	90.36% to 95.59%	1.246
< 9.865	8.163	3.220% to 19.19%	92.02	88.71% to 94.42%	1.023
< 9.875	10.2	4.438% to 21.76%	91.74	88.39% to 94.19%	1.235
< 9.895	10.2	4.438% to 21.76%	91.45	88.06% to 93.95%	1.194
< 9.915	12.24	5.735% to 24.24%	91.17	87.74% to 93.71%	1.386
< 9.925	14.29	7.096% to 26.67%	91.17	87.74% to 93.71%	1.618
< 9.935	14.29	7.096% to 26.67%	90.6	87.09% to 93.23%	1.519
< 9.950	16.33	8.513% to 29.04%	90.6	87.09% to 93.23%	1.737
< 9.970	16.33	8.513% to 29.04%	90.03	86.45% to 92.74%	1.637
< 9.985	18.37	9.976% to 31.36%	90.03	86.45% to 92.74%	1.842
< 9.995	20.41	11.48% to 33.64%	90.03	86.45% to 92.74%	2.047
< 10.01	20.41	11.48% to 33.64%	89.74	86.13% to 92.50%	1.99
< 10.02	20.41	11.48% to 33.64%	89.17	85.49% to 92.01%	1.885
< 10.03	20.41	11.48% to 33.64%	88.89	85.17% to 91.76%	1.837
< 10.04	20.41	11.48% to 33.64%	87.75	83.90% to 90.78%	1.666
< 10.05	20.41	11.48% to 33.64%	87.46	83.59% to 90.53%	1.628
< 10.07	20.41	11.48% to 33.64%	86.89	82.96% to 90.03%	1.557
< 10.08	22.45	13.02% to 35.88%	86.89	82.96% to 90.03%	1.713
< 10.09	24.49	14.60% to 38.09%	86.89	82.96% to 90.03%	1.869
< 10.10	24.49	14.60% to 38.09%	86.04	82.02% to 89.28%	1.754
< 10.11	26.53	16.21% to 40.26%	85.75	81.71% to 89.03%	1.862
< 10.12	28.57	17.85% to 42.41%	85.19	81.09% to 88.52%	1.929
< 10.13	28.57	17.85% to 42.41%	84.9	80.78% to 88.27%	1.892
< 10.14	30.61	19.52% to 44.53%	83.48	79.23% to 86.99%	1.853
< 10.15	30.61	19.52% to 44.53%	83.19	78.92% to 86.74%	1.821
< 10.16	34.69	22.92% to 48.69%	82.91	78.62% to 86.48%	2.03
< 10.18	34.69	22.92% to 48.69%	82.05	77.70% to 85.71%	1.933
< 10.19	34.69	22.92% to 48.69%	81.48	77.08% to 85.20%	1.873
< 10.20	38.78	26.43% to 52.75%	80.91	76.47% to 84.68%	2.031
< 10.21	42.86	30.02% to 56.73%	80.91	76.47% to 84.68%	2.245
< 10.22	46.94	33.70% to 60.62%	80.34	75.87% to 84.16%	2.388
< 10.23	48.98	35.58% to 62.53%	80.34	75.87% to 84.16%	2.492
< 10.24	51.02	37.47% to 64.42%	80.06	75.56% to 83.90%	2.558
< 10.25	53.06	39.38% to 66.30%	79.49	74.95% to 83.38%	2.587
< 10.26	53.06	39.38% to 66.30%	78.63	74.05% to 82.60%	2.483
< 10.27	53.06	39.38% to 66.30%	77.78	73.14% to 81.81%	2.388
< 10.28	53.06	39.38% to 66.30%	76.64	71.94% to 80.76%	2.271
< 10.29	53.06	39.38% to 66.30%	75.78	71.04% to 79.97%	2.191
< 10.30	55.1	41.32% to 68.15%	74.64	69.84% to 78.91%	2.173
< 10.31	59.18	45.25% to 71.78%	74.36	69.54% to 78.65%	2.308
< 10.33	61.22	47.25% to 73.57%	72.65	67.76% to 77.05%	2.239
< 10.34	61.22	47.25% to 73.57%	72.08	67.17% to 76.51%	2.193
< 10.35	63.27	49.27% to 75.33%	72.08	67.17% to 76.51%	2.266
< 10.36	67.35	53.38% to 78.79%	71.51	66.57% to 75.98%	2.364
< 10.37	69.39	55.47% to 80.48%	71.51	66.57% to 75.98%	2.436
< 10.38	71.43	57.59% to 82.15%	70.94	65.98% to 75.44%	2.458
< 10.39	71.43	57.59% to 82.15%	70.09	65.10% to 74.64%	2.388
< 10.40	71.43	57.59% to 82.15%	69.23	64.22% to 73.83%	2.321
< 10.41	71.43	57.59% to 82.15%	68.09	63.04% to 72.75%	2.239
< 10.42	71.43	57.59% to 82.15%	66.95	61.87% to 71.67%	2.161
< 10.43	73.47	59.74% to 83.79%	66.1	60.99% to 70.85%	2.167
< 10.44	75.51	61.91% to 85.40%	65.53	60.41% to 70.31%	2.19
< 10.45	77.55	64.12% to 86.98%	64.1	58.96% to 68.94%	2.16
< 10.46	77.55	64.12% to 86.98%	62.39	57.22% to 67.30%	2.062
< 10.47	77.55	64.12% to 86.98%	61.25	56.06% to 66.20%	2.002
< 10.48	77.55	64.12% to 86.98%	60.11	54.91% to 65.10%	1.944
< 10.49	77.55	64.12% to 86.98%	59.83	54.62% to 64.82%	1.931
< 10.50	81.63	68.64% to 90.02%	58.97	53.76% to 64.00%	1.99
< 10.51	83.67	70.96% to 91.49%	58.4	53.18% to 63.44%	2.012
< 10.52	83.67	70.96% to 91.49%	57.26	52.04% to 62.33%	1.958
< 10.53	83.67	70.96% to 91.49%	56.7	51.47% to 61.78%	1.932
< 10.54	83.67	70.96% to 91.49%	56.13	50.90% to 61.22%	1.907
< 10.55	83.67	70.96% to 91.49%	55.56	50.32% to 60.67%	1.883
< 10.56	85.71	73.33% to 92.90%	54.99	49.76% to 60.11%	1.904
< 10.57	87.76	75.76% to 94.27%	54.13	48.90% to 59.27%	1.913
< 10.58	87.76	75.76% to 94.27%	51.85	46.63% to 57.03%	1.823
< 10.59	87.76	75.76% to 94.27%	51	45.79% to 56.19%	1.791
< 10.60	87.76	75.76% to 94.27%	49.29	44.09% to 54.50%	1.73
< 10.61	87.76	75.76% to 94.27%	48.15	42.97% to 53.37%	1.692
< 10.62	87.76	75.76% to 94.27%	47.29	42.13% to 52.52%	1.665
< 10.63	89.8	78.24% to 95.56%	46.44	41.29% to 51.67%	1.677
< 10.64	89.8	78.24% to 95.56%	45.3	40.17% to 50.53%	1.642
< 10.65	91.84	80.81% to 96.78%	44.16	39.06% to 49.39%	1.645
< 10.66	91.84	80.81% to 96.78%	43.3	38.22% to 48.53%	1.62
< 10.67	93.88	83.48% to 97.90%	41.88	36.83% to 47.10%	1.615
< 10.68	93.88	83.48% to 97.90%	41.31	36.28% to 46.53%	1.6
< 10.69	95.92	86.29% to 99.27%	40.46	35.45% to 45.67%	1.611
< 10.70	95.92	86.29% to 99.27%	40.17	35.18% to 45.38%	1.603
< 10.71	95.92	86.29% to 99.27%	39.32	34.35% to 44.52%	1.581
< 10.72	95.92	86.29% to 99.27%	39.03	34.07% to 44.23%	1.573
< 10.73	95.92	86.29% to 99.27%	37.61	32.70% to 42.78%	1.537
< 10.74	95.92	86.29% to 99.27%	36.47	31.60% to 41.62%	1.51
< 10.75	95.92	86.29% to 99.27%	36.18	31.33% to 41.33%	1.503
< 10.76	95.92	86.29% to 99.27%	35.33	30.51% to 40.46%	1.483
< 10.77	95.92	86.29% to 99.27%	34.76	29.97% to 39.88%	1.47
< 10.78	95.92	86.29% to 99.27%	33.9	29.15% to 39.01%	1.451
< 10.79	95.92	86.29% to 99.27%	33.62	28.88% to 38.71%	1.445
< 10.80	95.92	86.29% to 99.27%	33.33	28.61% to 38.42%	1.439
< 10.81	95.92	86.29% to 99.27%	33.05	28.33% to 38.13%	1.433
< 10.82	97.96	89.31% to 99.90%	31.91	27.25% to 36.96%	1.439
< 10.83	97.96	89.31% to 99.90%	31.05	26.44% to 36.08%	1.421
< 10.85	97.96	89.31% to 99.90%	30.48	25.90% to 35.49%	1.409
< 10.86	97.96	89.31% to 99.90%	28.77	24.29% to 33.72%	1.375
< 10.87	97.96	89.31% to 99.90%	27.64	23.22% to 32.54%	1.354
< 10.88	97.96	89.31% to 99.90%	27.07	22.68% to 31.94%	1.343
< 10.89	100	92.73% to 100.0%	26.21	21.89% to 31.05%	1.355
< 10.90	100	92.73% to 100.0%	25.64	21.35% to 30.46%	1.345
< 10.91	100	92.73% to 100.0%	25.36	21.09% to 30.16%	1.34
< 10.93	100	92.73% to 100.0%	24.79	20.56% to 29.56%	1.33
< 10.94	100	92.73% to 100.0%	24.22	20.03% to 28.96%	1.32
< 10.95	100	92.73% to 100.0%	23.65	19.50% to 28.36%	1.31
< 10.96	100	92.73% to 100.0%	22.51	18.45% to 27.16%	1.29
< 10.97	100	92.73% to 100.0%	21.94	17.92% to 26.56%	1.281
< 10.98	100	92.73% to 100.0%	20.8	16.88% to 25.35%	1.263
< 10.99	100	92.73% to 100.0%	19.94	16.10% to 24.44%	1.249
< 11.00	100	92.73% to 100.0%	19.37	15.58% to 23.83%	1.24
< 11.02	100	92.73% to 100.0%	18.8	15.06% to 23.22%	1.232
< 11.03	100	92.73% to 100.0%	17.95	14.29% to 22.30%	1.219
< 11.04	100	92.73% to 100.0%	17.66	14.03% to 22.00%	1.215
< 11.05	100	92.73% to 100.0%	17.09	13.52% to 21.38%	1.206
< 11.06	100	92.73% to 100.0%	15.95	12.50% to 20.15%	1.19
< 11.07	100	92.73% to 100.0%	15.67	12.24% to 19.84%	1.186
< 11.08	100	92.73% to 100.0%	15.1	11.73% to 19.22%	1.178
< 11.09	100	92.73% to 100.0%	14.53	11.23% to 18.60%	1.17
< 11.10	100	92.73% to 100.0%	14.25	10.97% to 18.29%	1.166
< 11.11	100	92.73% to 100.0%	13.96	10.72% to 17.98%	1.162
< 11.12	100	92.73% to 100.0%	13.68	10.47% to 17.66%	1.158
< 11.13	100	92.73% to 100.0%	12.82	9.721% to 16.72%	1.147
< 11.14	100	92.73% to 100.0%	11.68	8.728% to 15.46%	1.132
< 11.15	100	92.73% to 100.0%	10.83	7.990% to 14.51%	1.121
< 11.17	100	92.73% to 100.0%	10.54	7.745% to 14.19%	1.118
< 11.19	100	92.73% to 100.0%	10.26	7.501% to 13.87%	1.114
< 11.21	100	92.73% to 100.0%	9.687	7.015% to 13.23%	1.107
< 11.22	100	92.73% to 100.0%	9.117	6.532% to 12.59%	1.1
< 11.24	100	92.73% to 100.0%	8.262	5.814% to 11.61%	1.09
< 11.25	100	92.73% to 100.0%	7.977	5.577% to 11.29%	1.087
< 11.27	100	92.73% to 100.0%	7.407	5.105% to 10.63%	1.08
< 11.28	100	92.73% to 100.0%	7.123	4.871% to 10.30%	1.077
< 11.30	100	92.73% to 100.0%	6.553	4.406% to 9.640%	1.07
< 11.32	100	92.73% to 100.0%	6.268	4.175% to 9.307%	1.067
< 11.33	100	92.73% to 100.0%	5.983	3.946% to 8.973%	1.064
< 11.35	100	92.73% to 100.0%	5.698	3.719% to 8.637%	1.06
< 11.37	100	92.73% to 100.0%	5.128	3.268% to 7.960%	1.054
< 11.40	100	92.73% to 100.0%	4.843	3.046% to 7.619%	1.051
< 11.44	100	92.73% to 100.0%	4.558	2.825% to 7.276%	1.048
< 11.46	100	92.73% to 100.0%	4.274	2.607% to 6.930%	1.045
< 11.47	100	92.73% to 100.0%	3.989	2.391% to 6.583%	1.042
< 11.50	100	92.73% to 100.0%	3.704	2.177% to 6.233%	1.038
< 11.53	100	92.73% to 100.0%	3.134	1.759% to 5.524%	1.032
< 11.57	100	92.73% to 100.0%	2.849	1.555% to 5.164%	1.029
< 11.60	100	92.73% to 100.0%	2.564	1.355% to 4.801%	1.026
< 11.62	100	92.73% to 100.0%	2.279	1.159% to 4.432%	1.023
< 11.66	100	92.73% to 100.0%	1.709	0.7857% to 3.679%	1.017
< 11.70	100	92.73% to 100.0%	1.425	0.6100% to 3.291%	1.014
< 11.75	100	92.73% to 100.0%	1.14	0.4440% to 2.893%	1.012
< 11.85	100	92.73% to 100.0%	0.8547	0.2330% to 2.482%	1.009
< 11.98	100	92.73% to 100.0%	0.5698	0.1012% to 2.053%	1.006
< 12.33	100	92.73% to 100.0%	0.2849	0.01461% to 1.596%	1.003

## Sheet: Multiple logistic regression
OUTCOMES	~ Intercept + CPSF1 + CPSF2 + CPSF3 + CPSF4 + CPSF5 + CPSF6 + CPSF7
Table Analyzed	Data 2
Dependent variable	PUTCOMES
Regression type	Logistic regression
Model
Parameter estimates	Variable	Estimate	Standard error	95% CI (profile likelihood)
β0	Intercept	-28.33	5.381	-39.59 to -18.36
β1	CPSF1	1.279	0.4064	0.4991 to 2.102
β2	CPSF2	2.021	0.6868	0.7479 to 3.437
β3	CPSF3	-4.967	0.7859	-6.650 to -3.560
β4	CPSF4	-2.187	0.4956	-3.223 to -1.267
β5	CPSF5	-0.1065	0.5416	-1.165 to 0.9703
β6	CPSF6	0.0418	0.6026	-1.154 to 1.222
β7	CPSF7	5.271	0.6286	4.135 to 6.613
Odds ratios	Variable	Estimate	95% CI (profile likelihood)
β0	Intercept	4.976e-13	6.414e-018 to 1.062e-008
β1	CPSF1	3.593	1.647 to 8.181
β2	CPSF2	7.545	2.112 to 31.09
β3	CPSF3	0.006967	0.001294 to 0.02845
β4	CPSF4	0.1123	0.03985 to 0.2816
β5	CPSF5	0.899	0.3119 to 2.639
β6	CPSF6	1.043	0.3154 to 3.394
β7	CPSF7	194.7	62.51 to 745.1
Model diagnostics	Degrees of Freedom	AICc
Intercept-only model	649	841.8
Selected model	642	197.9
Area under the ROC curve
Area	0.9868
Std. Error	0.003455
95% confidence interval	0.9800 to 0.9935
P value	<0.0001
Classification table	Predicted cancer	Predicted not cancer	Total	% Correctly classified
Observed cancer	411	13	424	96.93
Observed not cancer	20	206	226	91.15
Total	431	219	650	94.92
Negative predictive power (%)	95.36
Positive predictive power (%)	94.06
Classification cutoff	0.5
Pseudo R squared
Tjur's R squared	0.8204
Hypothesis tests	Statistic	P value	Null hypothesis	Reject Null Hypothesis?	P value summary
Hosmer-Lemeshow	14.01	0.0814	Selected model is correct	No	ns
Data summary
Rows in table	650
Rows skipped (missing data)	0
Rows analyzed (#observations)	650
Number of not cancer	226
Number of cancer	424
Number of parameter estimates	8
#observations/#parameters	81.3
# of not cancer/#parameters	28.3
# of cancer/#parameters	53
